1 **Intra-strain elicitation and suppression of plant immunity by *Ralstonia***  
2 ***solanacearum* type-III effectors in *Nicotiana benthamiana***

3

4 Yuying Sang<sup>1,#</sup>, Wenjia Yu<sup>1,2,#</sup>, Haiyan Zhuang<sup>1</sup>, Yali Wei<sup>1,2</sup>, Lida Derevnina<sup>3</sup>, Jiamin  
5 Luo<sup>1,2</sup> and Alberto P. Macho<sup>1\*</sup>.

6

7 <sup>1</sup>Shanghai Center for Plant Stress Biology, CAS Center for Excellence in Molecular  
8 Plant Sciences; Shanghai Institutes of Biological Sciences, Chinese Academy of  
9 Sciences, Shanghai 201602, China.

10 <sup>2</sup>University of Chinese Academy of Sciences, Beijing, China.

11 <sup>3</sup>The Sainsbury Laboratory, University of East Anglia, Norwich Research Park,  
12 Norwich, NR4 7UH, United Kingdom.

13

14 # These authors contributed equally to this work.

15 \* Corresponding author: Alberto P. Macho, [alberto.macho@sibs.ac.cn](mailto:alberto.macho@sibs.ac.cn)

16

17 Keywords: cell death; ETI; SGT1; effector; immunity; virulence; *Ralstonia*; salicylic  
18 acid; jasmonic acid; ICS1; PAL

19

20 **Abstract**

21 Effector proteins delivered inside plant cells are powerful weapons for bacterial  
22 pathogens, but this exposes the pathogen to potential recognition by the plant immune  
23 system. Therefore, effector acquisition must be balanced for a successful infection.  
24 *Ralstonia solanacearum* is an aggressive pathogen with a large repertoire of secreted  
25 effectors. One of these effectors, RipE1, is conserved in most *R. solanacearum* strains  
26 sequenced to date. In this work, we found that RipE1 triggers immunity in *N.*  
27 *benthamiana*, which requires the immune regulator SGT1, but not EDS1 or NRCs.  
28 Interestingly, RipE1-triggered immunity induces the accumulation of salicylic acid (SA)  
29 and the overexpression of several genes encoding phenylalanine-ammonia lyases  
30 (PALs), suggesting that the unconventional PAL-mediated pathway is responsible for  
31 the observed SA biosynthesis. Surprisingly, RipE1 recognition also induces the  
32 expression of jasmonic acid (JA)-responsive genes and JA biosynthesis, suggesting  
33 that both SA and JA may act cooperatively in response to RipE1. Finally, we found that  
34 RipE1 expression leads to the accumulation of glutathione in plant cells, which  
35 precedes the activation of immune responses. *R. solanacearum* encodes another  
36 effector, RipAY, which is known to inhibit immune responses by degrading cellular  
37 glutathione. Accordingly, we show that RipAY inhibits RipE1-triggered immune  
38 responses. This work shows a strategy employed by *R. solanacearum* to counteract  
39 the perception of its effector proteins by the plant immune system.

40

41 **Introduction**

42

43 *Ralstonia solanacearum* is considered one of the most destructive plant pathogens,  
44 and is able to cause disease in more than 250 plant species (Jiang et al., 2017;  
45 Mansfield et al., 2012). As a soil-borne bacterial pathogen, *R. solanacearum* enters  
46 plants through the roots, reaches the vascular system, and spreads through xylem  
47 vessels, colonizing the plant systemically (Mansfield et al., 2012). This is followed by  
48 massive bacterial replication and the disruption of the plant vascular system, leading to  
49 eventual plant wilting (Digonnet et al., 2012; Turner et al., 2009).

50

51 Most bacterial pathogens deliver proteins inside plant cells via a type-III secretion  
52 system (T3SS); such proteins are thus called type-III effectors (T3Es) (Galan et al,  
53 2014). T3Es have been reported to mediate the suppression of basal defenses and the  
54 manipulation of plant physiological functions to support bacterial proliferation (Macho  
55 et al, 2015; Macho, 2016). Resistant plants have evolved intracellular receptors  
56 defined by the presence of nucleotide-binding sites (NBS) and leucine-rich repeat  
57 domains (LRRs), thus termed NLRs (Cui et al, 2015). Specific NLRs can detect the  
58 activities of specific T3Es, leading to the activation of immune responses, which  
59 effectively prevent pathogen proliferation (Chiang & Coaker, 2015). The outcome of  
60 these responses is named effector-triggered immunity (ETI), and, in certain cases,  
61 may cause a hypersensitive response (HR) that involves the collapse of plant cells.  
62 Hormone-mediated signaling plays an essential role in plant immunity. Salicylic acid  
63 (SA) is considered the most important hormone in plant immunity against biotrophic  
64 pathogens (Vlot *et al.*, 2009; Burger & Chory, 2019); Jasmonic acid (JA), on the other  
65 hand, is considered the main mediator of immune responses against necrotrophic  
66 pathogens (Burger & Chory, 2019). In most cases, both hormones are considered as  
67 antagonistic, balancing the effects of each other (Burger & Chory, 2019).

68

69 In an evolutionary response to ETI, successful pathogens have acquired T3E activities  
70 to suppress this phenomenon (Jones & Dangl, 2006), although reports characterizing

71 T3E suppression of ETI remain scarce, particularly among T3Es within the same strain.  
72 While the development of additional T3E activities is a powerful virulence strategy, it  
73 also exposes the pathogen to further events of effector recognition. Therefore, the  
74 benefits and penalties of T3E secretion need to be finely and dynamically balanced in  
75 specific hosts, to ensure the appropriate manipulation of plant functions while evading  
76 or suppressing ETI. This balance may be particularly important for *R. solanacearum*,  
77 which secretes a larger number of T3Es in comparison to other bacterial plant  
78 pathogens (e.g. the reference GMI1000 strain is able to secrete more than 70 T3Es)  
79 (Peeters et al, 2013).

80

81 Plants have evolved to recognize immune elicitors from *R. solanacearum* (Wei et al,  
82 2018; Jayaraman et al., 2016). In terms of mechanism of T3E recognition, the most  
83 studied case in *R. solanacearum* is RipP2 (also known as PopP2), which is perceived  
84 in Arabidopsis by the RRS1-RPS4 NLR pair (Gassmann et al, 1999; Deslandes et al,  
85 2002; Tasset et al, 2010; Williams et al, 2014; Le Roux et al, 2015; Sarris et al, 2015).  
86 Additionally, several *R. solanacearum* T3Es were shown to induce cell death in  
87 different plant species (Peeters et al, 2013; Clarke et al, 2015), although, in most cases,  
88 it is unclear whether these are due to toxic effects caused by effector overexpression  
89 or a host immune response. Some *R. solanacearum* T3Es have also been shown to  
90 cause a restriction of host range; such is the case for RipAA and RipP1 (also known as  
91 AvrA and PopP1, respectively), which are perceived and restrict host range in  
92 *Nicotiana* species (Poueymiro et al, 2009). RipP1 also triggers resistance in petunia  
93 (Lavie et al, 2002). Similarly, RipB-triggered immunity has been reported as the major  
94 cause for avirulence of *R. solanacearum* RS1000 in *Nicotiana* species (Nakano &  
95 Mukaihara, 2019), RipAX2 (also known as Rip36) have been shown to induce  
96 resistance in eggplant and its wild relative *Solanum torvum* (Nahar et al, 2014; Morel et  
97 al, 2018), and several T3Es from the AWR family (also known as RipA) restrict  
98 bacterial growth in Arabidopsis (Sole et al, 2012). Although the utilization of these  
99 recognition systems to generate disease-resistant crops is tantalizing, it is imperative  
100 to understand the mechanisms underlying the activation of plant immunity and their

101 potential suppression by other T3Es within *R. solanacearum*.

102

103 The *ripE1* gene encodes a protein secreted by the type-III secretion system in the *R.*  
104 *solanacearum* GMI1000 strain (phylotype I) (Mukaihara et al, 2010), and is conserved  
105 across *R. solanacearum* strains from different phylotypes (Peeters et al, 2013). Based  
106 on sequence analysis, RipE1 is homologous to other T3Es in *Pseudomonas syringae*  
107 (HopX) and *Xanthomonas spp* (XopE) (Figure S1; Peeters et al, 2013), belonging to  
108 the HopX/AvrPphB T3E family (Nimchuk et al, 2007). This family is characterized by  
109 the presence of a putative catalytic triad consisting of specific cysteine, histidine, and  
110 aspartic acid residues, which are conserved in RipE1 (Nimchuk et al, 2007; Figure S1),  
111 and is similar to several enzyme families from the transglutaminase protein  
112 superfamily, such as peptide N-glycanases, phytochelatin synthases, and cysteine  
113 proteases (Makarova et al, 1999). AvrPphB, from *P. syringae* pv. *phaseolicola*, the  
114 original member of the HopX/AvrPphB family, was identified based on its ability to  
115 activate immunity in certain bean cultivars (Mansfield et al, 1994). Divergent members  
116 from this family in other strains also trigger immunity, and this requires the putative  
117 catalytic cysteine (Nimchuk et al, 2007). Previous sequence analysis of T3Es from the  
118 HopX family also identified a conserved domain (domain A) required for HopX  
119 induction of immunity in bean and Arabidopsis, which as hypothesized to represent a  
120 host-target interaction domain or a novel nucleotide/cofactor binding domain (Nimchuk  
121 et al, 2007).

122

123 In this work, we studied the impact of RipE1 in plant cells, and found that RipE1 is  
124 recognized by the plant immune system in both *N. benthamiana* and Arabidopsis,  
125 leading to the activation of immune responses. We further investigate the immune  
126 components and signaling pathways associated to this effector recognition. Finally, we  
127 found that another effector in *R. solanacearum* GMI1000 is able to inhibit  
128 RipE1-triggered immune responses in *N. benthamiana*, explaining the fact that RipE1  
129 does not seem to be an avirulence determinant in this plant species.

130 **Results**

131

132 **RipE1 triggers cell death upon transient expression in *Nicotiana benthamiana***

133

134 In order to understand the impact of RipE1 in plant cells, we first used an  
135 *Agrobacterium tumefaciens* (hereafter, *Agrobacterium*)-mediated expression system  
136 in *Nicotiana benthamiana* leaves to transiently express RipE1 that is fused to a  
137 carboxyl-terminal green fluorescent protein (GFP) tag (RipE1-GFP). Two days after  
138 *Agrobacterium* infiltration, we noticed the collapse of infiltrated tissues expressing  
139 RipE1-GFP, but not a GFP control (Figure 1a). This tissue collapse correlated with a  
140 release of ions from plant cells (Figure 1b), indicative of cell death. Mutation of the  
141 catalytic cysteine to an alanine residue has been shown to disrupt the catalytic activity  
142 of enzymes with a catalytic triad similar to that conserved in RipE1 (Gimenez-Ibanez et  
143 al, 2014; Figure 1c). To determine if the putative catalytic activity is required for RipE1  
144 induction of cell death, we generated an equivalent mutant in RipE1 (C172A; Figure  
145 1c). We also generated an independent mutant with a deletion on the eight amino  
146 acids that constitute the conserved domain A (Nimchuk et al, 2007; Figure 1c). These  
147 mutations did not affect the accumulation of RipE1 (Figure 1d), but abolished the  
148 induction of tissue collapse and the ion leakage caused by RipE1 expression (Figure  
149 1d and 1e), indicating that RipE1 requires both the catalytic cysteine and the  
150 conserved domain A for the induction of cell death in plants.

151

152 Interestingly, RipE1 was also identified in a systematic screen performed in our  
153 laboratory to identify *R. solanacearum* T3Es that suppress immune responses  
154 triggered by bacterial elicitors. In this screen we found that RipE1 expression  
155 suppresses the burst of reactive oxygen species (ROS) and the activation of  
156 mitogen-activated protein kinases (MAPKs) triggered upon treatment with the bacterial  
157 flagellin epitope flg22, which acts as an immune elicitor (Figure S2). RipE1 requires  
158 both the catalytic cysteine and the conserved domain A for this activity (Figure S2).  
159 However, we considered the possibility that these responses are abolished by the

160 death of plant cells rather than an active immune suppression. Time-course  
161 experiments showed that the suppression of flg22-triggered ROS correlated with the  
162 appearance of cell death (Figure S2), making it difficult to uncouple these  
163 observations.

164

### 165 **RipE1 activates salicylic acid-dependent immunity in *N. benthamiana***

166

167 The induction of cell death by pathogen effectors may reflect toxicity in plant cells or  
168 the activation of immune responses that lead to HR. Salicylic Acid (SA) plays a major  
169 role in the activation of immune responses after the perception of different types of  
170 invasion patterns (Vlot *et al.*, 2009). To determine whether RipE1 activates immune  
171 responses, we first measured the expression of the *N. benthamiana* ortholog of the  
172 Arabidopsis gene *PATHOGENESIS-RELATED-1 (PR1)*, which is a hallmark of  
173 SA-dependent immune responses (Vlot *et al.*, 2009, Ward *et al.*, 1991). Expression of  
174 RipE1-GFP (but not the C172A catalytic mutant) significantly enhanced the  
175 accumulation of *NbPR1* transcripts (Figure 2a). The bacterial salicylate hydroxylase  
176 NahG converts SA to catechol and leads to the suppression of SA-dependent  
177 responses (Delaney *et al.*, 1994). The expression of NahG-GFP in *N. benthamiana*  
178 slightly enhanced the accumulation of RipE1 fused to a carboxyl-terminal N-luciferase  
179 tag (Nluc) (Figure S3), consistent with the reported role of SA in hindering  
180 Agrobacterium-mediated transformation (Rosas-Diaz *et al.*, 2016); despite this, NahG  
181 partially suppressed RipE1-triggered cell death, ion leakage, and *NbPR1* expression  
182 (Figure 2b, c and d). Altogether, these data suggest that RipE1 induces SA-dependent  
183 immune responses in plant cells, which cause the development of HR cell death.

184

### 185 **RipE1 enhances the expression of *PAL* genes and the biosynthesis of salicylic 186 acid and jasmonic acid**

187

188 The expression of RipE1 led to a dramatic increase in SA accumulation in *N.*  
189 *benthamiana* (Figure 3a), consistent with the observed overexpression of *NbPR1*

190 (Figure 2a). This reinforces the idea that RipE1 is perceived by the plant immune  
191 system and this leads to the activation of SA biosynthesis and SA-dependent immune  
192 responses. In Arabidopsis, the chloroplastic pathway mediated by isochorismate  
193 synthetase 1 (ICS1) plays a predominant role in the pathogen-induced SA  
194 biosynthesis (Wildermuth et al, Nature, 2001; Garcion et al, Plant Physiology, 2008).  
195 However, gene expression analysis showed that the expression of the *N. benthamiana*  
196 ortholog of the Arabidopsis *ICS1*, *NbICS1*, was significantly reduced upon RipE1  
197 expression (Figure 3b), despite the simultaneous high *NbPR1* transcript accumulation  
198 (Figure 2a). SA can also be synthesized from phenylalanine in a pathway mediated by  
199 phenylalanine ammonia lyases (PALs). In contrast with the expression of *NbICS1*,  
200 several genes encoding NbPALs were up-regulated upon expression of RipE1, but not  
201 the catalytic mutant version (Figure 3c-e), suggesting that this pathway may mediate  
202 the enhancement in SA biosynthesis upon perception of RipE1 activity. SA and  
203 Jasmonic Acid (JA) are considered antagonistic hormones in plant immune responses.  
204 Surprisingly, instead of a reduction of JA-associated gene expression, we found a  
205 slight increase in the accumulation of *NbLOX2* transcripts in early time points upon  
206 expression of catalytically active RipE1 (Figure 3f). In Arabidopsis, LOX2 contributes  
207 to the biosynthesis of JA (Bell et al, 1995). Accordingly, we detected an increase in JA  
208 contents upon RipE1 expression (Figure S4), indicating that RipE1 perception does  
209 not inhibit JA signalling, but rather leads to an enhancement on JA biosynthesis and  
210 associated gene expression.

211

### 212 **RipE1-triggered immunity requires SGT1, but not EDS1 or NRC proteins**

213

214 The suppressor of the G2 allele of *skp1* (SGT1) plays an essential role in ETI, and is  
215 required for the induction of disease resistance mediated by most NLRs (Azevedo *et*  
216 *al.*, 2002; Kadota *et al.*, 2010). Virus-induced gene silencing (VIGS) of *NbSGT1*  
217 abolished RipE1-triggered cell death, ion leakage, and *NbPR1* expression (Figure  
218 4a-d), indicating that RipE1-triggered immunity requires SGT1. While most NLRs  
219 require SGT1 to function, a specific group of NLRs containing an N-terminal Toll-like



220 interleukin-1 receptor (TIR) domain also require EDS1 (Wiermer et al, 2005; Schultink  
221 et al, 2017). *N. benthamiana* plants carrying a stable knockout mutation in *EDS1*  
222 (Schultink et al, 2017) displayed clear RipE1-triggered cell death (Figure 4e),  
223 suggesting that RipE1-triggered immunity is not mediated by a TIR-NLR. Other NLRs  
224 contain a C-terminal coiled coil (CC) domain, and a specific subset of CC-NLRs  
225 require a network of helper NLRs termed NRC proteins (Wu et al, 2016). Interestingly,  
226 silencing of NRC proteins did not impact RipE1-triggered cell death (Figure S5),  
227 suggesting that RipE1-triggered immunity is not mediated by an NLR within the NRC  
228 network.

229

### 230 **RipE1 activates immunity in Arabidopsis**

231

232 Arabidopsis transgenic plants expressing RipE1-GFP from a 35S inducible promoter  
233 died after germination (data not shown). Therefore, we generated Arabidopsis  
234 transgenic plants expressing RipE1-GFP and RipE1<sup>C172A</sup>-GFP from an estradiol  
235 (EST)-inducible promoter. Five week-old plants expressing RipE1-GFP, but not  
236 RipE1<sup>C172A</sup>-GFP, showed reduced growth in soil upon EST treatment for 14 days  
237 (Figure 5a). To determine whether RipE1-triggered growth reduction in Arabidopsis  
238 correlates with the activation of immunity, we first monitored the expression of  
239 defence-related genes. Similar to the result observed upon expression in *N.*  
240 *benthamiana*, expression of RipE1 in Arabidopsis triggered the overexpression of  
241 *AtPR1* (Figure 5b). However, in Arabidopsis, the enhanced *PR1* expression correlated  
242 with an overexpression of *AtICS1*, but not *AtPAL1*, upon RipE1 expression (Figure 5b).  
243 As observed in *N. benthamiana*, RipE1 expression led to the overexpression of the JA  
244 marker genes *AtVSP2* and *AtPDF1.2* (REF; Figure 5b). This indicates that, as  
245 observed in *N. benthamiana*, RipE1 activates SA- and JA-dependent signalling in  
246 Arabidopsis. To determine whether the activation of defence-related genes leads to an  
247 efficient immune response in Arabidopsis, we inoculated RipE1-expressing plants by  
248 soil-drenching with *R. solanacearum*. As shown in the figure 5c, RipE1-expressing  
249 plants displayed weaker and delayed disease symptoms upon *R. solanacearum*

250 inoculation, reflecting an enhanced disease resistance upon *RipE1* expression.

251

252 **RipE1-triggered immune responses are suppressed by RipAY**

253

254 RipE1 expression activates immunity in *Arabidopsis* and *N. benthamiana*, although  
255 both plant species are susceptible hosts for *R. solanacearum* GMI1000 (or a derivative  
256 strain carrying mutations in *popP1* and *avrA*, in the case of *N. benthamiana*;  
257 Poueymiro et al, 2009), which carries RipE1. Therefore, we reasoned that other T3E(s)  
258 in GMI1000 may be able to suppress RipE1-triggered immunity in the context of  
259 infection. We recently identified a *R. solanacearum* T3E, RipAY, which is able to  
260 suppress SA-dependent immune responses through the degradation of glutathione  
261 (Sang et al, 2016; Mukaihara et al, 2016); however, the ability of RipAY to suppress  
262 immunity triggered by other *R. solanacearum* T3Es remained unknown. Interestingly,  
263 the expression of RipE1 in *N. benthamiana* leads to an increase in glutathione  
264 accumulation in plant tissues, which precedes the onset of immune responses (Figure  
265 6a). Considering that both RipAY and RipE1 are present in GMI1000, we sought to  
266 determine if RipAY has the ability to suppress RipE1-triggered immunity. Indeed,  
267 expression of RipAY in *N. benthamiana* did not affect the accumulation of RipE1  
268 (Figure S6), but abolished the tissue collapse and ion leakage caused by RipE1  
269 expression (Figure 6b, c, and d). Moreover, RipAY was able to suppress the  
270 overexpression of *NbPR1* triggered by RipE1 (Figure 6e), indicating that RipAY  
271 suppresses RipE1-triggered immune responses. Interestingly, however, a RipAY point  
272 mutant unable to degrade glutathione (RipAY<sup>E216Q</sup>; Sang et al, 2016) did not suppress  
273 RipE1-triggered responses (Figure 6b-e), suggesting that RipAY suppresses  
274 RipE1-triggered immunity through the degradation of cellular glutathione.

275

276

277 **Discussion**

278

279 Expression of T3Es in plant cells may either induce cell death because of cell toxicity  
280 or lead to the activation of an immunity-associated HR. Over-expression of RipE1 in *N.*  
281 *benthamiana* leads to cell death that: (i) is dependent on the immune regulator SGT1;  
282 (ii) activates SA accumulation and *PR1* expression; and (iii) is suppressed by the  
283 NahG and other *R. solanacearum* effectors, indicating that RipE1-mediated cell death  
284 is due to the activation of immunity in the host. Several T3Es within the HopX/AvrPphB  
285 family are predicted enzymes that are associated with activation of host immunity,  
286 although the association of the predicted catalytic activity with the activation of  
287 immunity seems to be differ among them. While the ability of AvrPphB and several  
288 other family members to trigger immunity requires the putative catalytic cysteine  
289 (Mansfield et al, 1994; Nimchuk et al, 2007), other members with the predicted  
290 catalytic activity, such as HopX from *P. syringae* pv *tabaci* or *P. syringae* pv  
291 *phaseolicola* race 6, do not trigger immunity in the same hosts (Stevens et al, 1998;  
292 Nimchuk et al, 2007). In the case of RipE1, the putative catalytic cysteine is required  
293 for the induction of immunity, which suggests that RipE1 is an active enzyme, and that  
294 this catalytic activity leads to perception by the host immune system. Moreover, the  
295 conserved domain A (Nimchuk et al, 2007) is also required for the activation of  
296 immunity by RipE1. In addition, we found that RipE1 is able to suppress  
297 elicitor-triggered immune responses in *N. benthamiana*. However, since this activity  
298 correlates with the induction of cell death, it is difficult to uncouple both observations,  
299 and further studies on the virulence activity of RipE1 will require the utilization of a host  
300 plant that is unable to recognize it.

301

302 The fact that RipE1 is recognized, and activate immune responses, in both *N.*  
303 *benthamiana* and *Arabidopsis* suggests at least two scenarios: it is possible that the  
304 NLR responsible for this recognition is conserved in both species; on the other hand, it  
305 is also possible that both species have independently develop NLRs that recognize  
306 RipE1. Although we did not identify the NLR involved, we determined that, at least in *N.*

307 *benthamiana*, RipE1 recognition does not rely on EDS1 or the NRC network, pointing  
308 to a CC- NRC-independent NLR. Interestingly, although RipE1 perception leads to the  
309 accumulation of SA in both plant species, the associated gene expression patterns  
310 seem to differ. The ICS pathway plays a predominant role in the pathogen-induced SA  
311 biosynthesis in Arabidopsis (Wildermuth et al, Nature, 2001; Garcion et al, Plant  
312 Physiology, 2008). In agreement with this, the RipE1-triggered overexpression of  
313 *AtPR1* in Arabidopsis correlates with an enhanced expression of *AtICS1*, but not  
314 *AtPAL1*. However, it seems that the RipE1-induced increase in SA content in *N.*  
315 *benthamiana* correlates with a reduction of *NbICS1* gene expression, and an increase  
316 in the expression of several *NbPAL* genes. Considering that ICS1 is normally regulated  
317 at the transcriptional level upon pathogen perception (Wildemurth et al, 2001), our  
318 results suggest that the PAL pathway is more relevant than the ICS pathway for the  
319 induction of RipE1-triggered immunity in *N. benthamiana*, indicating that both  
320 pathways are differentially required for distinct immune responses in different plant  
321 species. Similarly, both the ICS and PAL pathways have been reported to be required  
322 for pathogen-induced SA biosynthesis in soybean (Shine et al, New Phytol, 2016). The  
323 reduction in ICS1 expression in *N. benthamiana* may reflect a compensatory effect  
324 between the ICS and PAL pathway. In addition to different gene expression patterns,  
325 the physiological output in both plant species may be different. Although RipE1  
326 expression caused an inhibition of Arabidopsis growth, we did not observe any signs of  
327 cell death (data not shown), which contrasts with our observation in *N. benthamiana*.  
328 However, this may be caused by differences in the expression system used in both  
329 plants (Agrobacterium-mediated transient expression in *N. benthamiana* vs  
330 EST-induced expression in Arabidopsis stable transgenic plants).

331

332 Another surprising aspect of RipE1-triggered immunity is the fact that it leads to the  
333 simultaneous accumulation of SA and JA, and to a strong and moderate SA- and  
334 JA-triggered gene expression, respectively, in both *N. benthamiana* and Arabidopsis.  
335 This suggests that, in the case of RipE1-triggered immunity, SA and JA may play a  
336 cooperative role, possibly reflecting the complexity of the *R. solanacearum* infection

337 process compared to other pathogens.

338

339 If RipE1 triggers immunity in *N. benthamiana*, why is it that a GMI1000 strain without  
340 PopP1 and AvrA (but having RipE1) can cause a successful infection in *N.*  
341 *benthamiana* without triggering immunity (Poueymiro et al, 2009)? Here, we found that  
342 other effectors within GMI1000, such as RipAY, are able to inhibit RipE1-triggered  
343 immunity. Since RipE1 perception correlates with an enhancement of cellular  
344 glutathione, and RipAY requires its gamma-glutamyl cyclotransferase activity to inhibit  
345 RipE1-triggered HR, the degradation of glutathione or other gamma-glutamyl  
346 compounds (Sang et al, 2016; Mukaihara et al, 2016; Fujiwara et al, 2016) is the most  
347 likely mechanism for this inhibition. Besides RipAY, other T3Es within GMI1000 likely  
348 contribute to the suppression of RipE1-triggered HR by targeting other immune  
349 functions (Yu et al, bioRxiv, 2019; Wang & Macho, unpublished data). This reflects  
350 bacterial adaptation: RipE1 could be important for virulence, but also triggers immunity.  
351 In this context, instead of losing RipE1, *R. solanacearum* has developed other  
352 effectors to suppress the induction of immunity, while keeping RipE1 virulence activity.  
353 Similarly, although transient expression of HopX from *P. syringae* pv *tomato* (*Pto*)  
354 triggers HR in specific *Arabidopsis* accessions, it does not trigger an HR in the context  
355 of *Pto* infection (Nimchuk et al, 2007). It is possible that, as in the case of RipE1, the  
356 immune responses triggered by HopX are masked during *Pto* infection (as suggested  
357 in Nimchuk et al, 2007), likely due to the suppression by other effectors within the  
358 same strain.

359

360

361 **Materials and Methods**

362

363 **Plant materials and growth conditions**

364 *N. benthamiana* plants were grown on soil at one plant per pot in an environmentally  
365 controlled growth room at 25 °C under a 16-h light/8-h dark photoperiod with a  
366 light-intensity of 130  $\mu\text{E m}^{-2}\text{s}^{-1}$ . *A. thaliana* plants were grown under the same  
367 conditions as *N. benthamiana* for seeds collection. For bacteria virulence and ROS  
368 burst assays, *A. thaliana* plants were grown in a growth chamber controlled at 22°C  
369 with a 10 h photoperiod and a light-intensity of 100-150  $\mu\text{E m}^{-2}\text{s}^{-1}$ . After *R.*  
370 *solanacearum* inoculation, Arabidopsis plants were transferred to a growth chamber  
371 27°C with 75% humid under a 12-h light/12-h dark photoperiod.

372

373 **Chemicals**

374 The flg22 peptide (TRLSSGLKINSAKDDAAGLQIA) was purchased from Abclonal,  
375 USA. All other chemicals were purchased from Sigma-Aldrich unless otherwise  
376

377 **Plasmids, bacterial strains and cultivation conditions**

378 *R. solanacearum* GMI1000 was grown on solid BG medium plates or cultivated  
379 over-night in liquid BG medium at 28°C (Morel et al., 2018). The *ripE1* gene from *R.*  
380 *solanacearum* GMI1000 cloned in pDonor207 (donated by Nemo Peeters and  
381 Anne-Claire Cazale) was subcloned into pGWB505 by LR reaction (ThermoFisher,  
382 USA) to generate a fusion protein with eGFP tag at the C-terminal (Nakagawa *et al.*,  
383 2007). *RipE1* and *ripE1* mutants were inserted between BamH1 and Xho1 restriction  
384 sites on sXVE:GFPc:Bar estradiol inducible vector using enzyme digestion  
385 (Schlücking et al., 2013). These generated binary vectors were transformed into  
386 *Agrobacterium tumefaciens* (*Agrobacterium*) *GV3101* for transient or stable gene  
387 expression in *N. benthamiana* and *A. thaliana* plants. *Agrobacterium* carrying  
388 pGWB505 vectors were grown at 29°C and 220 rpm in LB medium supplemented with  
389 rifampicin 50 mg/l, gentamycin 25 mg/l and spectinomycin 50 mg/l, while those  
390 carrying estradiol inducible vectors were grown in rifampicin 50 mg/l, gentamycin 25

391 mg/l and kanamycin 50 mg/l.

392

### 393 **Site-directed mutagenesis**

394 *RipE1*<sub>C172A</sub> and *RipE1*  $\Delta$ AD mutant variants were generated using the QuickChange  
395 Lightning Site-Directed Mutagenesis Kit (Life technologies, USA) following the  
396 manufacturer's instructions. *RipE1*/pDONR207 plasmid was used as template.  
397 Primers used for the mutagenesis are listed in Table S1.

398

### 399 **Agrobacterium-mediated gene expression in *A. thaliana* and *N. benthamiana***

400 Stable transgenic Arabidopsis plants with *RipE1* and *RipE1* mutated variants driven  
401 by estradiol inducible promoter were obtained using the floral dip method (Zhang et. al,  
402 2006). Homozygous T<sub>3</sub> lines were used for all the experiments.  
403 Agrobacterium-mediated transient expression in *N. benthamiana* was performed as  
404 described (Li, 2011). Agrobacterium carrying the resultant plasmids were suspended  
405 in infiltration buffer to a final OD<sub>600</sub> of 0.1~0.5 and infiltrated into the abaxial side of the  
406 leaves using the 1mL needless syringe. Leaf samples were taken at 1-3 dpi (days  
407 post infiltration) for analysis based on experimental requirements.

408

### 409 **Protein extraction and western blots**

410 Plant tissues were collected into 2 ml tubes with metal beads and frozen in liquid  
411 nitrogen. After grinding with a tissue lyser (Qiagen, Germany) for 1 min at 30 rpm/s,  
412 proteins were extracted using protein extraction buffer (100 mM Tris-HCl pH 8, 150  
413 mM NaCl, 10% glycerol, 5 mM Ethylene diamine tetra acetic acid (EDTA), 2 mM  
414 Dithiothreitol (DTT), 1x Plant Protease Inhibitor cocktail, 1% NP-40, 2 mM  
415 Phenylmethylsulfonyl fluoride ( PMSF ), 10 mM Na<sub>2</sub>MoO<sub>4</sub>, 10 mM NaF, 2 mM Na<sub>3</sub>VO<sub>4</sub>)  
416 and incubating for 5 min. After centrifugation, the supernatants were mixed with SDS  
417 loading buffer, incubated at 70 °C for 10 min, and resolved using SDS-PAGE.  
418 Proteins were transferred to a PVDF membrane and monitored by western blot using  
419 anti-GFP (Abicode, M0802-3a) and anti-luciferase (Sigma, L0159) antibodies.

420

421 **Measurement of ROS generation and MAPK activation**

422 PAMP-triggered ROS burst and MAPK activation in plant leaves were measured as  
423 described previously (Sang et al., 2017; Segonzac *et al.*, 2011). ROS was elicited with  
424 50 nM flg22. MAPK activation assays were performed using 4 to 5-week-old *N.*  
425 *benthamiana*. Two days after Agrobacterium infiltration at OD<sub>600</sub> of 0.1, the intact  
426 leaves were elicited for 15 min after vacuum infiltration of 100nM pto-flg22. Leaf discs  
427 were taken to monitor MAPK activation by western blot with Phospho-p44/42 MAPK  
428 (Erk1/2; Thr-202/Tyr-204) antibodies.

429

430 **Cell death measurement**

431 Cell death in plant leaves was quantified as previously described (Yu et al, bioRxiv,  
432 2019) by measuring the electrolyte leakage using a conductivity meter (ThermoFisher,  
433 USA) or observing the autofluorescence using the BioRad Gel Imager (Bio-Rad, USA).  
434 Briefly, one day after Agrobacterium infiltration in *N. benthamiana*, one 13 mm leaf  
435 disk was immersed in 4 mL of distilled water for 1 h with gentle shaking and then  
436 transferred to a 6-well culture plate containing 4 mL distilled water in each well. The  
437 ion conductivity was then measured at different time intervals. Autofluorescence in  
438 intact *N. benthamiana* leaves was measured at 2.5 dpi.

439

440 **RNA isolation and qRT-PCR**

441 Total RNA was extracted using the E.Z.N.A. Plant RNA kit with DNA digestion on  
442 column (Biotek, China) according to the manufacturer's instructions. RNA samples  
443 were quantified with a Nanodrop spectrophotometer (ThermoFisher, USA). First  
444 strand cDNA was synthesized using the iScript™ cDNA synthesis kit (Bio-Rad).  
445 qRT-PCR was performed using the iTaq™ Universal SYBR Green Supermix (Bio-Rad)  
446 and CFX96 Real-time system (Bio-Rad) and the qPCR data was analyzed as  
447 described by (Livak & Schmittgen, 2001). Primers for qPCR of SA-JA related genes in  
448 *N. benthamiana* were used as described by Nakano and Mukaihara (2018). Primer  
449 sequences are listed in Table S1.

450



451 **Measurements of SA and JA content in plant leaves**

452 SA and JA content were quantified using the method described by Forcat and  
453 collaborators (2008) with the following modifications. Leaves (50 mg FW) were  
454 collected 42 hours after *Agrobacterium* infiltration and frozen in liquid nitrogen before  
455 grounding into fine powder with the Qiagen tissue lyser. SA and JA were extracted at  
456 10°C for 1 h using 70% methanol extraction solvent spiked with d4-SA as internal  
457 standards. Supernatant was taken after centrifuge at 20000 rcf for 10 min and  
458 analyzed on ACQUITY UPLC I-class coupled with AB SCIEX TripleTOF 5600+.  
459 Analytical column is ACQUITY UPLC BECH C18 1.7 µm, 2.1X150 mm column. The  
460 JA concentration was calculated based on the calibration curve created by running JA  
461 standard solution. The results were analyzed by peakview1.2.

462

463 **Measurements of total cellular glutathione in *N. benthamiana* leaves**

464 Total cellular glutathione was measured as previously described (Sang et al, 2016).  
465 Briefly, 10 mg of *N. benthamiana* leaves were collected and glutathione was  
466 measured using a Glutathione Assay Kit (Beyotime, China) according to the  
467 manufacturer's instructions.

468

469 **Virus-induced gene silencing (VIGS) in *N. benthamiana***

470 VIGS in *N. benthamiana* plants was performed using TRV vectors as described  
471 (Senthil-Kumar & Mysore, 2014). VIGS of *NbSGT1* was performed with several  
472 modifications described by Yu and collaborators (2019). Cultures of *Agrobacterium*  
473 carrying pTRV2:*NbSGT1* plasmids or pTRV2 plasmids were mixed at 1:1 ratio and  
474 co-infiltrated into the lower leaves of 3-week-old *N. benthamiana* plants. The upper  
475 leaves were used for experimental assay within 7-10 days after VIGS application.  
476 Silencing of NRCs (NLR required for cell death) in *N. benthamiana* and subsequent  
477 expression of T3Es was performed as described by Wu and collaborators (2017).

478

479 ***Ralstonia solanacearum* virulence assay**

480 Four week-old *A. thaliana* plants, grown in Jiffy pots, were inoculated with *R.*  
481 *solanacearum* without wounding by soil drenching. An overnight-grown bacterial  
482 suspension was diluted to obtain an inoculum of  $5 \cdot 10^7$  cfu/ml. Once the Jiffy pots were  
483 completely drenched, the plants were removed from the bacterial solution and placed  
484 back on a bed of potting mixture soil. The genotypes to be tested were placed in a  
485 random order in order to allow an unbiased analysis of the wilting. Daily scoring of the  
486 visible wilting on a scale ranging from 0 to 4 (or 0 to 100% leaves wilting), led to an  
487 analysis using the Kaplan-Meier survival analysis, log-rank test and hazard ratio  
488 calculation as previously described (Morel et al., 2018)

489

490

491

492

493

494

495

496

497 **Acknowledgements**

498 We thank Nemo Peeters and Anne-Claire Cazale for sharing unpublished biological  
499 materials, Chanhong Kim and Brian Staskawicz for sharing biological materials, Rosa  
500 Lozano-Duran for critical reading of this manuscript, and Xinyu Jian for technical and  
501 administrative assistance during this work. We thank the PSC Cell Biology,  
502 Proteomics, and Metabolomics core facilities for assistance with confocal microscopy  
503 and mass spectrometry analysis, respectively. This work was supported by the  
504 Strategic Priority Research Program of the Chinese Academy of Sciences  
505 (grant XDB27040204), the National Natural Science Foundation of China (NSFC;  
506 grant 31571973), the Chinese 1000 Talents Program, and the Shanghai Center for  
507 Plant Stress Biology (Chinese Academy of Sciences). The authors have no conflict of  
508 interest to declare.

509

510

---

511 **References**

- 512 Azevedo, C., Sadanandom, A., Kitagawa, K., Freialdenhoven, A., Shirasu, K., and  
513 Schulze-Lefert, P. (2002). The RAR1 interactor SGT1, an essential  
514 component of *R* gene-triggered disease resistance. *Science* 295:2073-2076.
- 515 Bell E, Creelman RA, Mullet JE. (1995). A chloroplast lipoxygenase is required for  
516 wound-induced jasmonic acid accumulation in *Arabidopsis*. Proceedings of  
517 the National Academy of Sciences, USA 92: 8675–8679.
- 518 Burger, M., and Chory, J. (2019). Stressed out about hormones: how plants  
519 orchestrate immunity. *Cell Host Microbe* 26:163-172.
- 520 Catherine, D., Yves, M., Nicolas, D., Marine, C., Patrick, D., Philippe, R., Yves, M.,  
521 Alain, J., and Deborah, G. (2012). Deciphering the route of *Ralstonia*  
522 *solanacearum* colonization in *Arabidopsis thaliana* roots during a compatible  
523 interaction: focus at the plant cell wall. *Planta* 236:1419-1431.
- 524 Chiang, Y.-H., and Coaker, G. (2015). Effector Triggered Immunity: NLR immune  
525 perception and downstream defense responses. *The Arabidopsis Book* 2015.
- 526 Clarke, C.R., Studholme, D.J., Byron, H., Brendan, R., Alexandra, W., Rongman, C.,  
527 Tadeusz, W., Marie-Christine, D., Emmanuel, W., and Castillo, J.A. (2015).  
528 Genome-enabled phylogeographic investigation of the quarantine pathogen  
529 *Ralstonia solanacearum* Race 3 Biovar 2 and screening for sources of  
530 resistance against its core effectors. *Phytopathology* 105:597-607.
- 531 Cui, H., Tsuda, K., Parker, J.E. (2015). Effector-triggered immunity: from pathogen  
532 perception to robust defense. In: *Annual Review Plant Biology*. 487-511.
- 533 Delaney, T.P., Uknes, S., Vernooij, B., Friedrich, L., Weymann, K., Negrotto, D.,  
534 Gaffney, T., Gut-Rella, M., Kessmann, H., and Ward, E. (1994). A central role  
535 of salicylic acid in plant disease resistance. *Science* 266:1247-1250.
- 536 Forcat, S., Bennett, M., Mansfield, J., and Grant, M. (2008). A rapid and robust  
537 method for simultaneously measuring changes in the phytohormones ABA, JA  
538 and SA in plants following biotic and abiotic stress. *Plant methods* 4:16.
- 539 Fujiwara, S., Kawazoe, T., Ohnishi, K., Kitagawa, T., Popa, C., Valls, M., Genin, S.,  
540 Nakamura, K., Kuramitsu, Y., and Tanaka, N. (2016). RipAY, a plant pathogen  
541 effector protein exhibits robust  $\gamma$ -glutamyl cyclotransferase activity when  
542 stimulated by eukaryotic thioredoxins. *Journal of Biological Chemistry*  
543 291:6813.
- 544 Galán, J.E., Lara-Tejero, M., Marlovits, T.C., and Wagner, S. (2014). Bacterial type III  
545 secretion systems: specialized nanomachines for protein delivery into target  
546 cells. *Annual Review of Microbiology* 68:415.
- 547 Garcion, C., Lohmann, A., Lamodièrre, E., Catinot, J., Buchala, A., Doermann, P., and  
548 Métraux, J.-P. (2008). Characterization and biological function of the  
549 ISOCHORISMATE SYNTHASE2 gene of *Arabidopsis*. *Plant Physiology*  
550 147:1279-1287.
- 551 Gassmann, W., Hirsch, M.E., and Staskawicz, B.J. (2010). The *Arabidopsis* RPS4  
552 bacterial-resistance gene is a member of the TIR-NBS-LRR family of

- 553 disease-resistance genes. *Plant Journal for Cell & Molecular Biology*  
554 20:265-277.
- 555 Gimenez-Ibanez, S., Boter, M., Fernández-Barbero, G., Chini, A., Rathjen, J.P., and  
556 Solano, R. (2014). The bacterial effector HopX1 targets JAZ transcriptional  
557 repressors to activate jasmonate signaling and promote infection in  
558 *Arabidopsis*. *PLoS Biology* 12:e1001792-e1001792.
- 559 Jayaraman, J., Segonzac, C., Cho, H., Jung, G., and Sohn, K.H. (2016).  
560 Effector-assisted breeding for bacterial wilt resistance in horticultural crops.  
561 *Horticulture Environment & Biotechnology* 57:415-423.
- 562 Jiang, G., Wei, Z., Xu, J., Chen, H., Zhang, Y., She, X., Macho, A.P., Ding, W., and  
563 Liao, B. (2017). Bacterial wilt in China: history, current status, and future  
564 perspectives. *Frontiers in Plant Science* 8:1549.
- 565 Jones, J.D.G., and Dangl, J.L. (2006). The plant immune system. *Nature*  
566 444:323-329.
- 567 Kadota, Y., Shirasu, K., and Guerois, R. (2010). NLR sensors meet at the  
568 SGT1–HSP90 crossroad. *Trends in biochemical sciences* 35:199-207.
- 569 Lavie, M., Shillington, E., Eguiluz, C., Grimsley, N., and Boucher, C. (2002). PopP1, a  
570 new member of the YopJ/AvrRxv family of type III effector proteins, acts as a  
571 host-specificity factor and modulates aggressiveness of *Ralstonia*  
572 *solanacearum*. *Molecular plant-microbe interactions : MPMI* 15:1058.
- 573 Leroux, C., Huet, G., Jauneau, A., Camborde, L., Trémousaygue, D., Kraut, A., Zhou,  
574 B., Levailant, M., Adachi, H., and Yoshioka, H. (2015). A receptor pair with an  
575 integrated decoy converts pathogen disabling of transcription factors to  
576 immunity. *Cell* 161:1074-1088.
- 577 Li, X. (2011). Infiltration of *Nicotiana benthamiana* protocol for transient expression via  
578 *Agrobacterium*. *Bio-protocol* Bio101:e95.
- 579 Livak, K.J., and Schmittgen, T.D. (2001). Analysis of relative gene expression data  
580 using real-time quantitative PCR and the 2(-Delta Delta C(T)) Method.  
581 *Methods* 25:402-408.
- 582 Macho, A.P. (2016). Subversion of plant cellular functions by bacterial type-III  
583 effectors: beyond suppression of immunity. *New Phytologist* 210:51-57.
- 584 Macho, A.P., and Zipfel, C. (2015). Targeting of plant pattern recognition  
585 receptor-triggered immunity by bacterial type-III secretion system effectors.  
586 *Current Opinion in Microbiology* 23:14-22.
- 587 Makarova, K.S., Aravind, L., and Koonin, E.V. (1999). A superfamily of archaeal,  
588 bacterial, and eukaryotic proteins homologous to animal transglutaminases.  
589 *Protein Science* 8:1714-1719.
- 590 Manifold, John, GENIN, Stephane, MAGORI, Shimpei, CITOVSKY, Vitaly, and  
591 SRIARIYANUM. (2012). Top 10 plant pathogenic bacteria in molecular plant  
592 pathology. *Molecular Plant Pathology* 13:614-629.
- 593 Mansfield, J., Jenner, C., Hockenull, R., Bennett, M.A., and Stewart, R. (1994).  
594 Characterization of *avrPphE*, a gene for cultivar-specific avirulence from  
595 *Pseudomonas syringae* pv. *phaseolicola* which is physically linked to *hrpY*, a

- 596 new hrp gene identified in the halo-blight bacterium. *Molecular Plant Microbe*  
597 *Interaction* 7:726-739.
- 598 Morel A, G.J., Lonjon F, Sujeeun L, Barberis P, Genin S, Vaillau F, Daunay MC,  
599 Dintinger J, Poussier S, Peeters N, Wicker E. (2018). The eggplant AG91-25  
600 recognizes the Type III-secreted effector RipAX2 to trigger resistance to  
601 bacterial wilt (*Ralstonia solanacearum* species complex). *Molecular Plant*  
602 *Pathology* 19:13.
- 603 Morel, A., Peeters, N., Vaillau, F., Barberis, P., Jiang, G., Berthomé, R., and Guidot,  
604 A. (2018). Plant pathogenicity phenotyping of *Ralstonia solanacearum*  
605 strains. in: *Host-Pathogen Interactions: Methods and Protocols*--Medina, C.,  
606 and López-Baena, F.J., eds. New York, NY: Springer New York. 223-239.
- 607 Mukaihara, T., Hatanaka, T., Nakano, M., and Oda, K. (2016). *Ralstonia*  
608 *solanacearum* Type III effector RipAY is a glutathione-degrading enzyme that  
609 is activated by plant cytosolic thioredoxins and suppresses plant immunity.  
610 *Mbio* 7:e00359.
- 611 Mukaihara, T., Tamura, N., and Iwabuchi, M. (2010). Genome-wide identification of a  
612 large repertoire of *Ralstonia solanacearum* type III effector proteins by a new  
613 functional screen. *Molecular Plant Microbe Interaction* 23:251-262.
- 614 Nahar, K., Matsumoto, I., Taguchi, F., Inagaki, Y., Yamamoto, M., Toyoda, K.,  
615 Shiraishi, T., Ichinose, Y., and Mukaihara, T. (2014). *Ralstonia solanacearum*  
616 type III secretion system effector Rip36 induces a hypersensitive response in  
617 the nonhost wild eggplant *Solanum torvum*. *Molecular Plant Pathology*  
618 15:297-303.
- 619 Nakagawa, T., Suzuki, T., Murata, S., Nakamura, S., Hino, T., Maeo, K., Tabata, R.,  
620 Kawai, T., Tanaka, K., and Niwa, Y. (2007). Improved Gateway binary vectors:  
621 high-performance vectors for creation of fusion constructs in transgenic  
622 analysis of plants. *Journal of the Agricultural Chemical Society of Japan*  
623 71:2095-2100.
- 624 Nakano M, M.T. (2019). The type III effector RipB from *Ralstonia solanacearum*  
625 RS1000 acts as a major avirulence factor in *Nicotiana benthamiana* and other  
626 *Nicotiana* species. *Mol Plant Pathol* 20:14.
- 627 Nakano, M., and Mukaihara, T. (2018). *Ralstonia solanacearum* Type III effector  
628 RipAL targets chloroplasts and induces jasmonic acid production to suppress  
629 salicylic acid-mediated defense responses in plants. *Plant and Cell Physiology*  
630 59:2576-2589.
- 631 Nimchuk, Z.L., Fisher, E.J., Desveaux, D., Chang, J.H., and Dangl, J.L. (2007). The  
632 HopX (AvrPphE) family of *Pseudomonas syringae* type III effectors require a  
633 catalytic triad and a novel N-terminal domain for function. *Molecular*  
634 *plant-microbe interactions* : *MPMI* 20:346.
- 635 Peeters, N., Carrère, S., Anisimova, M., Plener, L., Cazalé, A.C., and Genin, S.  
636 (2013a). Repertoire, unified nomenclature and evolution of the Type III effector  
637 gene set in the *Ralstonia solanacearum* species complex. *BMC Genomics*  
638 14:859-859.

- 
- 639 Peeters, N., Guidot, A., Vailleau, F., and Valls, M. (2013b). *Ralstonia solanacearum*, a  
640 widespread bacterial plant pathogen in the post-genomic era. *Molecular Plant*  
641 *Pathology* 14:651–662.
- 642 Poueymiro, M., Cunnac, S., Barberis, P., Deslandes, L., Peeters, N., Cazale-Noel,  
643 A.C., Boucher, C., and Genin, S. (2009). Two type III secretion system  
644 effectors from *Ralstonia solanacearum* GMI1000 determine host-range  
645 specificity on tobacco. *Molecular Plant Microbe Interaction* 22:538-550.
- 646 Rosas-Díaz, T., Cana-Quijada, P., Amorim-Silva, V., Botella, M.A., Lozano-Durán, R.,  
647 and Bejarano, E.R. (2017). *Arabidopsis NahG* plants as a suitable and efficient  
648 system for transient expression using *Agrobacterium tumefaciens*. *Molecular*  
649 *Plant* 10:353-356.
- 650 Sang, Y., and Macho, A.P. (2017). Analysis of PAMP-triggered ROS burst in plant  
651 immunity. *Methods in Molecular Biology* 1578:143.
- 652 Sang, Y., Wang, Y., Ni, H., Casalã, A.C., She, Y.M., Peeters, N., and Macho, A.P.  
653 (2016). The *Ralstonia solanacearum* type III effector RipAY targets plant redox  
654 regulators to suppress immune responses. *Molecular Plant Pathology* 19.
- 655 Sarris, P., Duxbury, Z., Huh, S.U., Ma, Y., Segonzac, C., Sklenar, J., Derbyshire, P.,  
656 Cevik, V., Rallapalli, G., and Saucet, S. (2015). A plant immune receptor  
657 detects pathogen effectors that target WRKY transcription factors. *Cell*  
658 161:1089-1100.
- 659 Schlücking, K., Kai, H.E., Köster, P., Drerup, M.M., Eckert, C., Steinhorst, L., Waadt,  
660 R., Batistič, O., and Kudla, J. (2013). A new  $\beta$ -estradiol-inducible vector set  
661 that facilitates easy construction and efficient expression of transgenes  
662 reveals CBL3-dependent cytoplasm to tonoplast translocation of CIPK5.  
663 *Molecular Plant* 6:1814-1829.
- 664 Schultink, A., Qi, T., Lee, A., Steinbrenner, A.D., and Staskawicz, B. (2017). Roq1  
665 mediates recognition of the *Xanthomonas* and *Pseudomonas* effector proteins  
666 XopQ and HopQ1. *Plant Journal* 92.
- 667 Segonzac, C., Feike, D., Gimenez Ibanez, S., Dagmar R, H., Zipfel, C., and John P,  
668 R. (2011). Hierarchy and roles of pathogen-associated molecular  
669 pattern-induced responses in *Nicotiana benthamiana*. *Plant Physiology*  
670 156:687-699.
- 671 Senthil-Kumar, M., and Mysore, K.S. (2014). Tobacco rattle virus-based  
672 virus-induced gene silencing in *Nicotiana benthamiana*. *Nature Protocols*  
673 9:1549.
- 674 Shine, M.B., Yang, J.W., El-Habbak, M., Nagyabhyru, P., Fu, D.Q., Navarre, D.,  
675 Ghabrial, S., Kachroo, P., and Kachroo, A. (2016). Cooperative functioning  
676 between phenylalanine ammonia lyase and isochorismate synthase activities  
677 contributes to salicylic acid biosynthesis in soybean. *New Phytologist*  
678 212:627-636.
- 679 Solé, M., Popa, C., Mith, O., Sohn, K.H., Jones, J., Deslandes, L., and Valls, M.  
680 (2012). The awr gene family encodes a novel class of *Ralstonia solanacearum*

- 681 type III effectors displaying virulence and avirulence activities. *Molecular*  
682 *plant-microbe interactions* : MPMI 25:941-953.
- 683 Stevens, C., Bennett, M.A., Athanassopoulos, E., Tsiamis, G., Taylor, J.D., and  
684 Mansfield, J.W. (1998). Sequence variations in alleles of the avirulence gene  
685 *avrPphE.R2* from *Pseudomonas syringae* pv. *phaseolicola* lead to loss of  
686 recognition of the AvrPphE protein within bean cells and a gain in  
687 cultivar-specific virulence. *Molecular Microbiology* 29:165-177.
- 688 Tasset, C., Bernoux, M., Jauneau, A., Pouzet, C., Brière, C., Kieffer-Jacquino, S.,  
689 Rivas, S., Marco, Y., and Deslandes, L. (2010). Autoacetylation of the  
690 *Ralstonia solanacearum* effector PopP2 targets a lysine residue essential for  
691 RRS1-R-mediated immunity in Arabidopsis. *PLOS Pathogens* 6:e1001202.
- 692 Turner, M., Jauneau, A., Genin, S., Tavella, M.J., Vailleau, F., Gentzittel, L., and  
693 Jardinaud, M.F. (2009). Dissection of bacterial wilt on *Medicago truncatula*  
694 revealed two type III secretion system effectors acting on root infection  
695 process and disease development. *Plant Physiology* 150:1713-1722.
- 696 Vlot, A.C., Dempsey, D.M.A., and Klessig, D.F. (2009). Salicylic acid, a multifaceted  
697 hormone to combat disease. *Annual Review of Phytopathology* 47:177-206.
- 698 Ward, E.R., Uknes, S.J., Williams, S.C., Dincher, S.S., Wiederhold, D.L., Alexander,  
699 D.C., Ahlgoy, P., Métraux, J.P., and Ryals, J.A. (1991). Coordinate gene  
700 activity in response to agents that induce systemic acquired resistance. *Plant*  
701 *Cell* 3:9.
- 702 Wei, Y., Caceres-Moreno, C., Jimenez-Gongora, T., Wang, K., Sang, Y.,  
703 Lozano-Duran, R., and Macho, A.P. (2017). The *Ralstonia solanacearum*  
704 *csp22* peptide, but not flagellin-derived peptides, is perceived by plants from  
705 the Solanaceae family. *Plant Biotechnology Journal* 16.
- 706 Wiermer, Marcel, FEYS, Bart, J., PARKER, and Jane, E. (2005). Plant immunity : the  
707 EDS1 regulatory node. *Current Opinion in Plant Biology* 8:383-389.
- 708 Wildermuth, M.C., Dewdney, J., Wu, G., and Ausubel, F.M. (2001). Isochorismate  
709 synthase is required to synthesize salicylic acid for plant defence. *Nature*  
710 414:562-565.
- 711 Williams, S.J., Kee Hoon, S., Li, W., Maud, B., Sarris, P.F., Cecile, S., Thomas, V.,  
712 Yan, M., Saucet, S.B., and Ericsson, D.J. (2014). Structural basis for  
713 assembly and function of a heterodimeric plant immune receptor. *Science*  
714 344:299-303.
- 715 Wu, C.-H., Abd-El-Halim, A., Bozkurt, T.O., Belhaj, K., Terauchi, R., Vossen, J.H.,  
716 and Kamoun, S. (2017). NLR network mediates immunity to diverse plant  
717 pathogens. *Proceedings of the National Academy of Sciences USA*  
718 114:8113-8118.
- 719 Wu, C.H., Belhaj, K., Bozkurt, T.O., Birk, M.S., and Kamoun, S. (2016). Helper NLR  
720 proteins NRC2a/b and NRC3 but not NRC1 are required for Pto-mediated cell  
721 death and resistance in *Nicotiana benthamiana*. *New Phytologist*  
722 209:1344-1352.



- 723 Yu, G., Xian, L., Sang, Y., and Macho, A.P. (2019a). Cautionary notes on the use of  
724 Agrobacterium-mediated transient gene expression upon SGT1 silencing in  
725 *Nicotiana benthamiana*. *New Phytologist* 222:14-17.
- 726 Yu, G., Xian, L., Xue, H., Yu, W., Rufian, J., Sang, Y., Morcillo, R., Wang, Y., and  
727 Macho, A.P. (2019b). A bacterial effector protein prevents MAPK-mediated  
728 phosphorylation of SGT1 to suppress plant immunity. bioRxiv:641241.
- 729 Zhang, X., Henriques, R., Lin, S.-S., Niu, Q.-W., and Chua, N.-H. (2006).  
730 Agrobacterium-mediated transformation of *Arabidopsis thaliana* using the  
731 floral dip method. *Nature Protocols* 1:641.
- 732

---

733 **Figure legends**

734 **Figure 1. RipE1 triggers cell death in *Nicotiana benthamiana*.**

735 (a) RipE1-GFP or GFP (as control) were expressed in the same leaf of *N.*  
736 *benthamiana* using Agrobacterium with an OD<sub>600</sub> of 0.5. Photos were taken 2 days  
737 post-inoculation with a CCD camera (upper panel) or an UV camera (lower panel). UV  
738 signal corresponds to the development of cell death (not GFP fluorescence). UV  
739 images were taken from the abaxial side and flipped horizontally for representation. (b)  
740 Ion leakage measured in leaf discs taken from *N. benthamiana* tissues expressing  
741 RipE1-GFP or GFP (as control), representative of cell death, at the indicated  
742 timepoints. Values indicate mean  $\pm$  SE (n=3). (c) Simplified diagram of RipE1,  
743 including the residues comprising the Domain A and the predicted catalytic triad. (d)  
744 Western blot showing the accumulation of RipE1 mutant variants.  $\Delta$ AD corresponds  
745 to a deletion mutant of the Domain A (residues 121-128). Molecular weight (kDa)  
746 marker bands are indicated for reference. (e) Cell death triggered by RipE1 mutant  
747 variants (conditions as in (a)). (f) Ion leakage measured in leaf discs taken from *N.*  
748 *benthamiana* tissues expressing RipE1 mutant variants (conditions as in (b)). Each  
749 experiment was repeated at least 3 times with similar results.

750

751 **Figure 2. RipE1 activates SA-dependent immune responses in *N. benthamiana*.**

752 (a) Quantitative RT-PCR to determine the expression of RipE1 and *NbPR1* in *N.*  
753 *benthamiana* tissues expressing GFP, RipE1, or RipE1 C172A, using Agrobacterium  
754 with an OD<sub>600</sub> of 0.5. Samples were taken at the indicated times after Agrobacterium  
755 infiltration. In each case, the RipE1 variants and their respective GFP control were  
756 expressed in the same leaf, and values are represented side-by-side. Expression  
757 values are relative to the expression of the housekeeping gene *NbEF1a*. Values  
758 indicate mean  $\pm$  SE (n=3). (b-d) RipE1-Nluc was co-expressed with GFP (as control)  
759 or with NahG-GFP in the same leaf. Protein accumulation is shown in the figure S3. (b)  
760 Photos were taken 2.5 days post-inoculation with a CCD camera (upper panel) or an  
761 UV camera (lower panel). UV signal corresponds to the development of cell death  
762 (not GFP fluorescence). UV images were taken from the abaxial side and flipped

---

763 horizontally for representation. (c) Ion leakage measured in leaf discs taken from *N.*  
764 *benthamiana* tissues expressing RipE1 together with GFP or NahG-GFP,  
765 representative of cell death, at the indicated timepoints. Values indicate mean  $\pm$  SE  
766 (n=3). (c) Quantitative RT-PCR to determine the expression of *NbPR1* in *N.*  
767 *benthamiana* tissues 48 hours after Agrobacterium infiltration. Expression values are  
768 relative to the expression of the housekeeping gene *NbEF1a*. Values indicate mean  $\pm$   
769 SE (n=3). Each experiment was repeated at least 3 times with similar results.

770

771 **Figure 3. RipE1 perception enhances the expression of PAL genes and SA**  
772 **biosynthesis in *N. benthamiana*.**

773 (a) Measurement of SA accumulation in *N. benthamiana* tissues expressing GFP,  
774 RipE1, or RipE1 C172A, using Agrobacterium with an OD<sub>600</sub> of 0.5. Samples were  
775 taken 42 hours after Agrobacterium infiltration. Three independent biological repeats  
776 were performed, and the different colors indicate values from different replicates.  
777 Values are represented as % of the GFP control in each replicate. (b-f) Quantitative  
778 RT-PCR to determine the expression of *NbICS1* (b), *NbPAL05* (c), *NbPAL08* (d),  
779 *NbPAL10* (e), and *NbLOX2* (f) in *N. benthamiana* tissues expressing GFP, RipE1, or  
780 RipE1 C172A, using Agrobacterium with an OD<sub>600</sub> of 0.5. Samples were taken at the  
781 indicated times after Agrobacterium infiltration. In each case, the RipE1 variants and  
782 their respective GFP control were expressed in the same leaf, and values are  
783 represented side-by-side. Expression values are relative to the expression of the  
784 housekeeping gene *NbEF1a*. Values indicate mean  $\pm$  SE (n=3). Each experiment was  
785 repeated at least 3 times with similar results.

786

787 **Figure 4. RipE1-triggered responses require SGT1, but not EDS1.**

788 (a-d) RipE1-GFP or GFP (as control) were expressed in the same leaf of *N.*  
789 *benthamiana* undergoing VIGS of *NbSGT1* or VIGS with an empty vector (EV)  
790 construct (as control), using Agrobacterium with an OD<sub>600</sub> of 0.5. (a) Western blot  
791 showing the accumulation of GFP, RipE1-GFP, and endogenous *NbSGT1*. Molecular  
792 weight (kDa) marker bands are indicated for reference. Vertical lines next to the bands

---

793 are due to the high sensitivity setting used in the imaging equipment. (b) Photos were  
794 taken 2 days post-inoculation with a CCD camera (upper panel) or an UV camera  
795 (lower panel). UV signal corresponds to the development of cell death (not GFP  
796 fluorescence). UV images were taken from the abaxial side and flipped horizontally for  
797 representation. (c) Ion leakage measured in leaf discs taken from *N. benthamiana*  
798 tissues expressing RipE1-GFP or GFP (as control), representative of cell death, 48  
799 hours after Agrobacterium infiltration. Values indicate mean  $\pm$  SE (n=3). (d)  
800 Quantitative RT-PCR to determine the expression of *NbPR1* in *N. benthamiana*  
801 tissues 48 hours after Agrobacterium infiltration. Expression values are relative to the  
802 expression of the housekeeping gene *NbEF1a*. Values indicate mean  $\pm$  SE (n=3). (e)  
803 RipE1-GFP or GFP (as control) were expressed in the same leaf of *N. benthamiana*  
804 wild type or a stable *eds1* knockout mutant, using Agrobacterium with an OD<sub>600</sub> of 0.5.  
805 Photos were taken 2 days post-inoculation with a CCD camera (upper panel) or an  
806 UV camera (lower panel). UV signal corresponds to the development of cell death  
807 (not GFP fluorescence). UV images were taken from the abaxial side and flipped  
808 horizontally for representation. Each experiment was repeated at least 3 times with  
809 similar results.

810

811 **Figure 5. RipE1 triggers immunity in Arabidopsis.**

812 (a) Arabidopsis Col-0 wild type or independent stable transgenic lines expressing  
813 RipE1 or RipE1 C172A from an estradiol (EST)-inducible promoter were grown for 3  
814 weeks and then treated sprayed with 100  $\mu$ M EST daily. Photographs were taken 2  
815 weeks after beginning the EST treatment. (b) Arabidopsis 4 day-old seedlings were  
816 treated with 25  $\mu$ M EST and samples were taken 1, 2, 3, or 4 days after EST  
817 treatment. Quantitative RT-PCR to determine the expression of *RipE1*, *AtPR1*,  
818 *AtPAL1*, *AtICS1*, *AtVSP2*, and *AtPDF1.2*. Expression values are relative to the  
819 expression of the housekeeping gene *AtACT2*. Values indicate mean  $\pm$  SE (n=3). (c)  
820 Plants in (a) were inoculated with *R. solanacearum* GMI1000 by soil-drenching. The  
821 results are represented as disease progression, showing the average wilting

---

822 symptoms in a scale from 0 to 4 (mean  $\pm$  SEM). n=20 plants per genotype. Each  
823 experiment was repeated at least 3 times with similar results.

824

825 **Figure 6. RipE1-triggered immune responses are suppressed by RipAY.**

826 (a) RipE1-GFP or GFP (as control) were expressed in the same leaf of *N.*  
827 *benthamiana* using Agrobacterium with an OD<sub>600</sub> of 0.5, and samples were taken at  
828 the indicated time points to measure the accumulation of glutathione (GSH). (b-d)  
829 RipE1-Nluc was co-expressed with GFP (as control), with RipAY-GFP, or with  
830 RipAY-C216A-GFP, respectively, in the same leaf. Protein accumulation is shown in  
831 the figure S6. (b) Photos were taken 2.5 days post-inoculation with a CCD camera  
832 (upper panel) or an UV camera (lower panel). UV signal corresponds to the  
833 development of cell death (not GFP fluorescence). UV images were taken from the  
834 abaxial side and flipped horizontally for representation. (c) Ion leakage measured in  
835 leaf discs taken from *N. benthamiana* tissues expressing RipE1 together with GFP or  
836 NahG-GFP, representative of cell death, at the indicated timepoints. Values indicate  
837 mean  $\pm$  SE (n=3). (c) Quantitative RT-PCR to determine the expression of *NbPR1* in  
838 *N. benthamiana* tissues 48 hours after Agrobacterium infiltration. Expression values  
839 are relative to the expression of the housekeeping gene *NbEF1a*. Values indicate  
840 mean  $\pm$  SE (n=3). Each experiment was repeated at least 3 times with similar results.

841

842 **Figure S1. Phylogenetic analysis of RipE1**

843 Alignment of the amino acid sequence of RipE1 from *R. solanacearum* GMI1000  
844 (Rs\_RipE1), XopE1 from *Xanthomonas campestris* pv. *vesicatoria* (Xs\_XopE1), and  
845 HopX1 from *Pseudomonas syringae* pv *tabaci* 11528 (Ps\_HopX1). Residues forming  
846 the predicted catalytic triad are indicated in red, and the conserved domain A is  
847 indicated in blue. The black shaded amino acids are identical among the three  
848 effectors.

849

850 **Figure S2. RipE1 expression inhibits PTI responses in *N. benthamiana*, which**

851 **correlates with the induction of cell death.**

852 Agrobacterium was used to induce the transient expression of RipE1-GFP in half of  
853 the leaf and GFP in the other half. (a) Oxidative burst triggered by 50 nM flg22 in *N.*  
854 *benthamiana* tissues at the indicated time points, measured in a luminol-based assay  
855 as relative luminescence units (RLU). Values are average  $\pm$  SE (n=24), and are  
856 represented as % of the GFP control in each time point. Western blot with anti-GFP is  
857 shown for reference of protein accumulation at each time point. (b) MAPK activation  
858 was induced 40 hours after Agrobacterium infiltration with 100 nM flg22 and analysed  
859 15 minutes after flg22 treatment using anti-phosphorylated MAPK antibody  
860 (anti-pMAPK). Immunoblots were also analysed using anti-GFP antibody to verify  
861 protein accumulation. Anti-actin was used to verify equal loading. Molecular weight  
862 (kDa) marker bands are indicated for reference. (c) Oxidative burst was induced as in  
863 (a) and measured 2 days post-Agrobacterium infiltration. Mutant variants are  
864 described in the Figure 1. (d) Ion leakage was measured as in the Figure 1.  
865 Measurement over time after RipE1 expression reflects that the induction of cell death  
866 correlates in time with the suppression of PTI responses. The experiments were  
867 repeated three times with similar results.

868

869 **Figure S3. Protein accumulation upon co-expression of RipE1 and NahG.**

870 Western blot showing protein accumulation in the experiments shown in the figure 2.  
871 Molecular weight (kDa) marker bands are indicated for reference.

872

873 **Figure S4. RipE1 expression leads to an increase in JA contents.**

874 Measurement of JA accumulation in *N. benthamiana* tissues expressing GFP or  
875 RipE1, using Agrobacterium with an OD<sub>600</sub> of 0.5. Samples were taken 42 hours after  
876 Agrobacterium infiltration. Three independent biological repeats were performed, and  
877 the different colors indicate values from different replicates. Values are represented  
878 as % of the GFP control in each replicate.

879

880 **Figure S5. RipE1-triggered cell death does not require NRC proteins.**

881 RipE1-GFP, C172A or GFP (as control) were transiently expressed using  
882 agrobacterium into wild type (WT) *N. benthamiana*, leaves silenced with EV (as  
883 control) and those silenced with different NRC homologs (NRC2/3, NRC4 and  
884 NRC2/3/4-Triple), using VIGS. For RipE1-GFP, C172A and GFP an OD<sub>600</sub> of 0.5 was  
885 used. Rpib1b2 (OD<sub>600</sub> 0.2)/AVRb1b2 (OD<sub>600</sub> 0.1) and Pto (OD<sub>600</sub> 0.6)/AVRPto (OD<sub>600</sub>  
886 0.1), which are NRC4 and NRC2/3 dependent, respectively, were included as controls.  
887 Photos were taken 5 days post inoculation under natural or UV light. UV images were  
888 taken from the abaxial side and flipped horizontally for representation.

889

890 **Figure S6. Protein accumulation upon co-expression of RipE1 and RipAY.**

891 Western blot showing protein accumulation in the experiments shown in the figure 6.

892 Molecular weight (kDa) marker bands are indicated for reference.

893

894

895 **Table S1:** Primers used in this study for RipE1 cloning and qRT-PCR.

| Gene                                                                         | Forward primers                  | Reverse primers                   |
|------------------------------------------------------------------------------|----------------------------------|-----------------------------------|
| <b>Primers for site-directed amino acid mutation</b>                         |                                  |                                   |
| <i>RipE1-C17</i>                                                             | AGGGGCGGGGAACGCCGGCGA            | GGCGTGTTCGCCGGCGTTCCC             |
| 2A                                                                           | ACACGCC                          | CGCCCCT                           |
| <i>RipE1 ΔAD</i>                                                             | GATACTGACGCACATCGACGCC<br>ACCCA  | TGGGTGGCGTCGATGTGCGTCA<br>GTATC   |
| <b>Primers for qRT-PCR in <i>N. benthamiana</i></b>                          |                                  |                                   |
| <i>NbEF1a</i>                                                                | CCCAAGAGGCCCTCAGACA              | CACACGACCAACAGGGACAGT             |
| <i>NbPR-1</i>                                                                | GGTCAACACGGCGAAAACC              | GCCTTAGCAGCCGTCATGA               |
| <i>NbICS1</i>                                                                | GTGTCGGCTCTGCTGTCTTCT            | CTGCGTATAGCACGCCAATC              |
| <i>NbPAL05</i>                                                               | AAGGGAGCTGAAATCGCCAT             | TCCGCACTTTGGACATGGTT              |
| <i>NbPAL08</i>                                                               | TATCACCCCATGCTTGCCTC             | AGTGGCCTTGGAATTGGGTC              |
| <i>NbPAL10</i>                                                               | GTCACTCCATGTTTGCCCCT             | GACCTGTGAGTAAACCGGCA              |
| <i>NbLOX2</i>                                                                | TCTTGGGTGGCTCCTCTGACT            | TGTTGGAGGTCTGCCTGTTCT             |
| <b>Primers for qRT-PCR in <i>A. thaliana</i></b>                             |                                  |                                   |
| <i>AtACTIN2</i>                                                              | TGCTGGACGTGACCTTACTG             | TTCTCGATGGAAGAGCTGGT              |
| <i>AtPR1</i>                                                                 | TGATCCTCGTGGGAATTATGT            | TGCATGATCACATCATTACTTCA<br>T      |
| <i>AtICS1</i>                                                                | GCGTCGTTTCGGTTACAGG              | ACAGCGAGGCTGAATCTCAT              |
| <i>AtPAL1</i>                                                                | TATCCCGAACAGGATCAAGG             | TCTCCGGTCAAAAGCTCTGT              |
| <i>AtPDF1.2</i>                                                              | ACTATGTCTTCCCAGCACAC             | AACAACAACGGGAAAATAAA              |
| <i>AtVSP2</i>                                                                | GTTTGGATCTTTGACCTAGACG<br>A      | CTCTAACCACGACCAGTACGC             |
| <b>Primers for cloning RipE1 to sXVE:GFPc:Bar estradiol inducible vector</b> |                                  |                                   |
| <i>RipE1</i>                                                                 | TCAGGATCCATGCCGCCCGTCC<br>TGCCGT | ACTCTCGAGGCTTTCCGTGGCG<br>GGCGGCT |



Figure 1

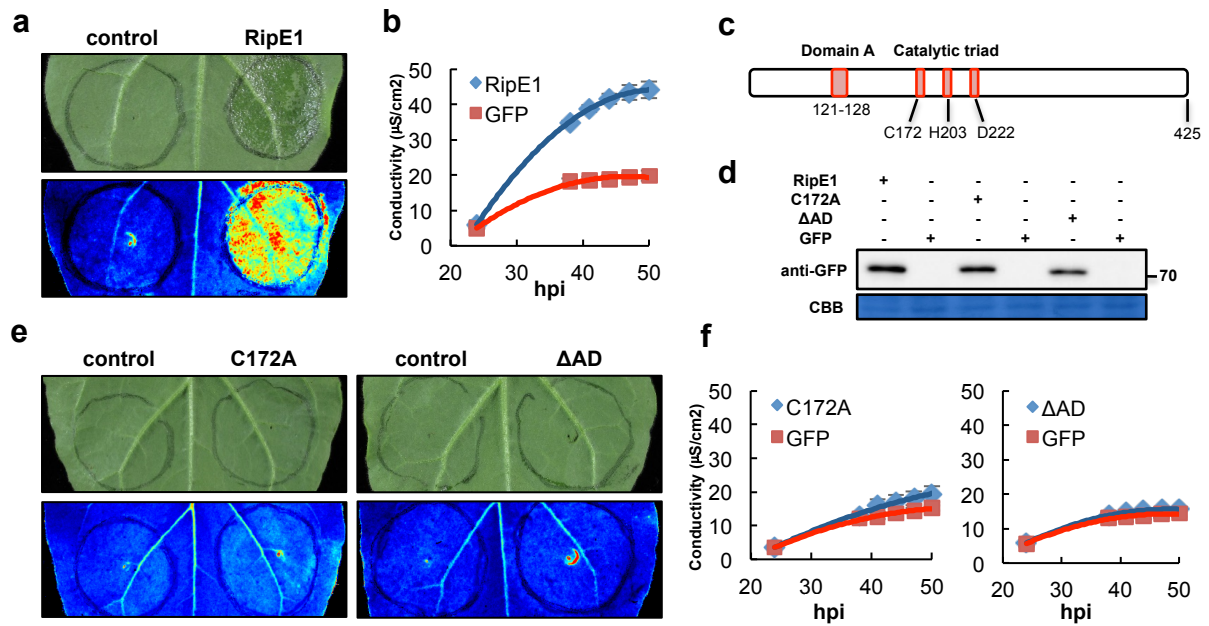

**Figure 1. RipE1 triggers cell death in *Nicotiana benthamiana*.**

(a) RipE1-GFP or GFP (as control) were expressed in the same leaf of *N. benthamiana* using *Agrobacterium* with an  $\text{OD}_{600}$  of 0.5. Photos were taken 2 days post-inoculation with a CCD camera (upper panel) or an UV camera (lower panel). UV signal corresponds to the development of cell death (not GFP fluorescence). UV images were taken from the abaxial side and flipped horizontally for representation. (b) Ion leakage measured in leaf discs taken from *N. benthamiana* tissues expressing RipE1-GFP or GFP (as control), representative of cell death, at the indicated timepoints. Values indicate mean  $\pm$  SE ( $n=3$ ). (c) Simplified diagram of RipE1, including the residues comprising the Domain A and the predicted catalytic triad. (d) Western blot showing the accumulation of RipE1 mutant variants.  $\Delta\text{AD}$  corresponds to a deletion mutant of the Domain A (residues 121-128). Molecular weight (kDa) marker bands are indicated for reference. (e) Cell death triggered by RipE1 mutant variants (conditions as in (a)). (f) Ion leakage measured in leaf discs taken from *N. benthamiana* tissues expressing RipE1 mutant variants (conditions as in (b)). Each experiment was repeated at least 3 times with similar results.

Figure 2

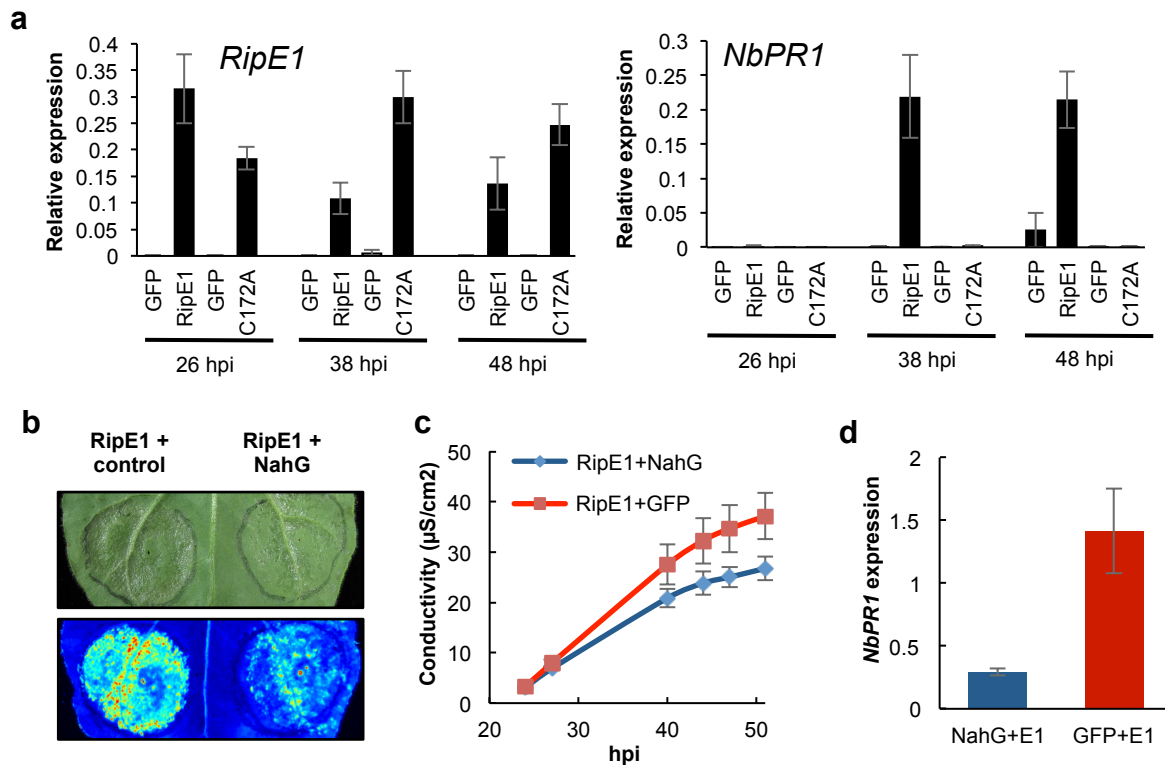

**Figure 2. RipE1 activates SA-dependent immune responses in *N. benthamiana*.**

(a) Quantitative RT-PCR to determine the expression of RipE1 and *NbPR1* in *N. benthamiana* tissues expressing GFP, RipE1, or RipE1 C172A, using *Agrobacterium* with an  $\text{OD}_{600}$  of 0.5. Samples were taken at the indicated times after *Agrobacterium* infiltration. In each case, the RipE1 variants and their respective GFP control were expressed in the same leaf, and values are represented side-by-side. Expression values are relative to the expression of the housekeeping gene *NbEF1a*. Values indicate mean  $\pm$  SE (n=3). (b-d) RipE1-Nluc was co-expressed with GFP (as control) or with NahG-GFP in the same leaf. Protein accumulation is shown in the figure S3. (b) Photos were taken 2.5 days post-inoculation with a CCD camera (upper panel) or an UV camera (lower panel). UV signal corresponds to the development of cell death (not GFP fluorescence). UV images were taken from the abaxial side and flipped horizontally for representation. (c) Ion leakage measured in leaf discs taken from *N. benthamiana* tissues expressing RipE1 together with GFP or NahG-GFP, representative of cell death, at the indicated timepoints. Values indicate mean  $\pm$  SE (n=3). (d) Quantitative RT-PCR to determine the expression of *NbPR1* in *N. benthamiana* tissues 48 hours after *Agrobacterium* infiltration. Expression values are relative to the expression of the housekeeping gene *NbEF1a*. Values indicate mean  $\pm$  SE (n=3). Each experiment was repeated at least 3 times with similar results.

Figure 3

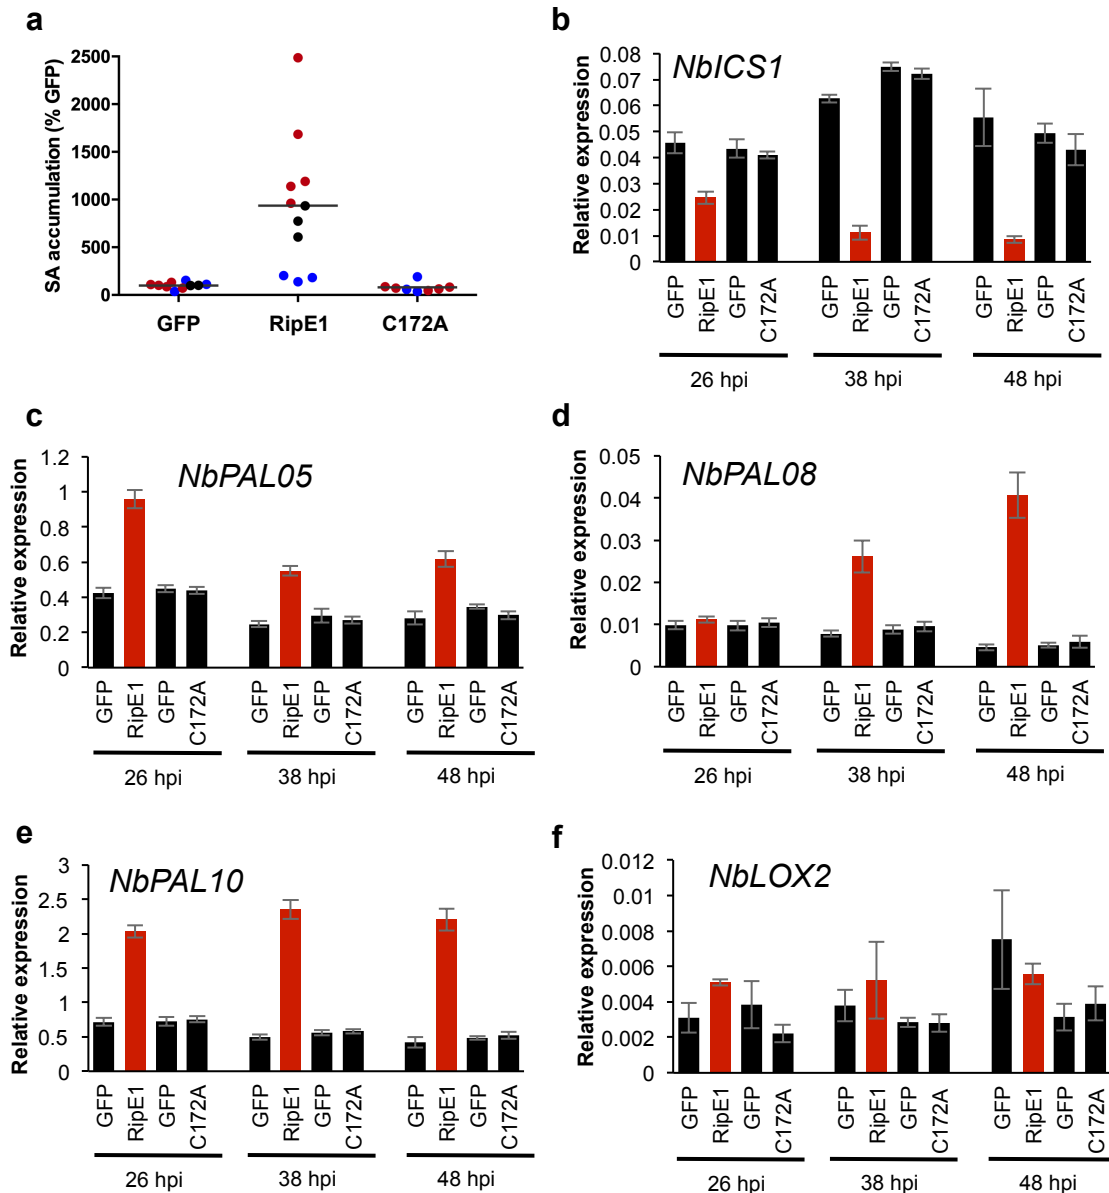

**Figure 3. RipE1 perception enhances the expression of PAL genes and SA biosynthesis in *N. benthamiana*.**

(a) Measurement of SA accumulation in *N. benthamiana* tissues expressing GFP, RipE1, or RipE1 C172A, using Agrobacterium with an OD<sub>600</sub> of 0.5. Samples were taken 42 hours after Agrobacterium infiltration. Three independent biological repeats were performed, and the different colors indicate values from different replicates. Values are represented as % of the GFP control in each replicate. (b-f) Quantitative RT-PCR to determine the expression of *NbICS1* (b), *NbPAL05* (c), *NbPAL08* (d), *NbPAL10* (e), and *NbLOX2* (f) in *N. benthamiana* tissues expressing GFP, RipE1, or RipE1 C172A, using Agrobacterium with an OD<sub>600</sub> of 0.5. Samples were taken at the indicated times after Agrobacterium infiltration. In each case, the RipE1 variants and their respective GFP control were expressed in the same leaf, and values are represented side-by-side. Expression values are relative to the expression of the housekeeping gene *NbEF1a*. Values indicate mean ± SE (n=3). Each experiment was repeated at least 3 times with similar results.

Figure 4

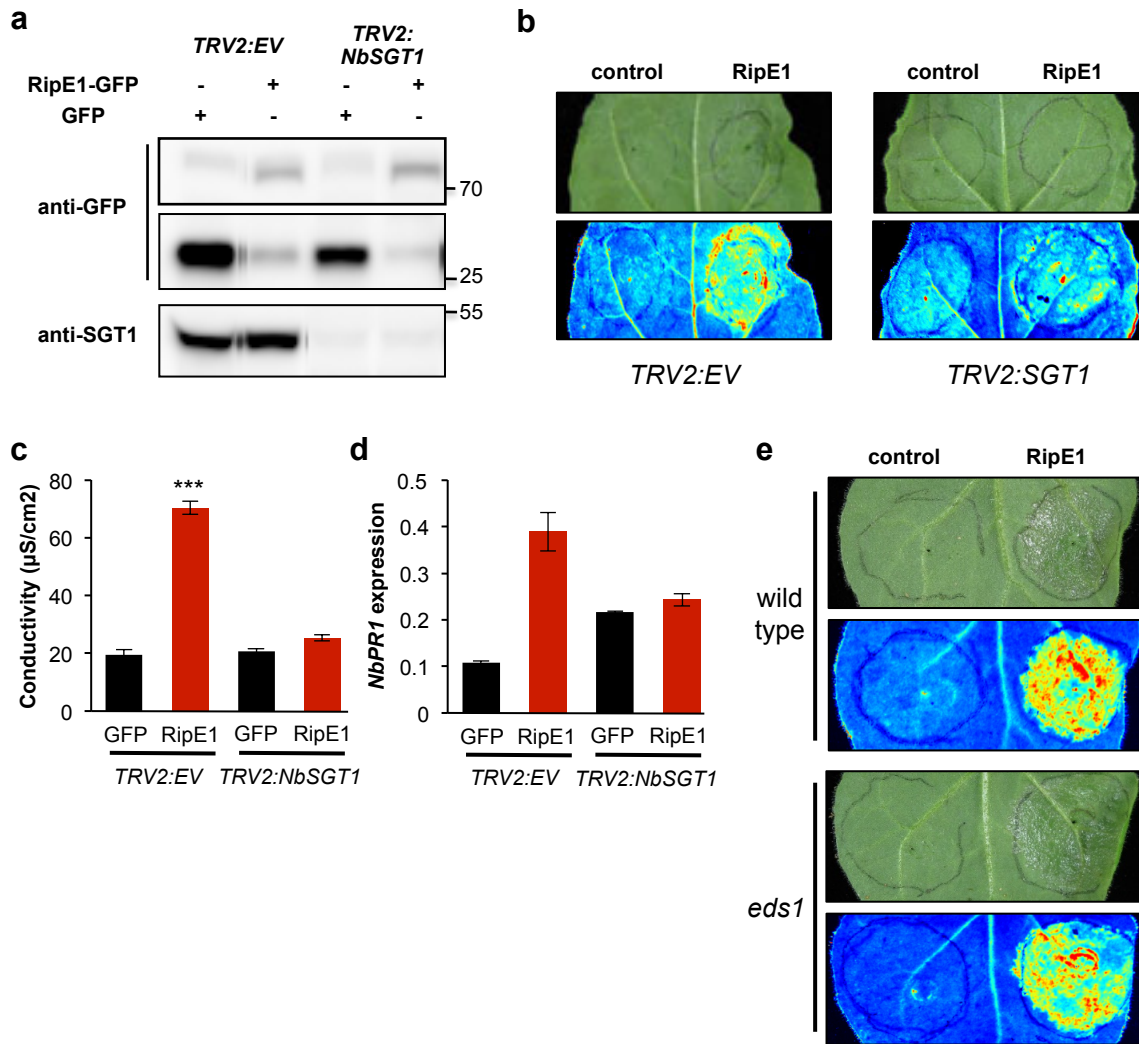

**Figure 4. RipE1-triggered responses require SGT1, but not EDS1.**

(a-d) RipE1-GFP or GFP (as control) were expressed in the same leaf of *N. benthamiana* undergoing VIGS of *NbSGT1* or VIGS with an empty vector (EV) construct (as control), using *Agrobacterium* with an OD<sub>600</sub> of 0.5. (a) Western blot showing the accumulation of GFP, RipE1-GFP, and endogenous *NbSGT1*. Molecular weight (kDa) marker bands are indicated for reference. Vertical lines next to the bands are due to the high sensitivity setting used in the imaging equipment. (b) Photos were taken 2 days post-inoculation with a CCD camera (upper panel) or an UV camera (lower panel). UV signal corresponds to the development of cell death (not GFP fluorescence). UV images were taken from the abaxial side and flipped horizontally for representation. (c) Ion leakage measured in leaf discs taken from *N. benthamiana* tissues expressing RipE1-GFP or GFP (as control), representative of cell death, 48 hours after *Agrobacterium* infiltration. Values indicate mean ± SE (n=3). (d) Quantitative RT-PCR to determine the expression of *NbPR1* in *N. benthamiana* tissues 48 hours after *Agrobacterium* infiltration. Expression values are relative to the expression of the housekeeping gene *NbEF1a*. Values indicate mean ± SE (n=3). (e) RipE1-GFP or GFP (as control) were expressed in the same leaf of *N. benthamiana* wild type or a stable *eds1* knockout mutant, using *Agrobacterium* with an OD<sub>600</sub> of 0.5. Photos were taken 2 days post-inoculation with a CCD camera (upper panel) or an UV camera (lower panel). UV signal corresponds to the development of cell death (not GFP fluorescence). UV images were taken from the abaxial side and flipped horizontally for representation. Each experiment was repeated at least 3 times with similar results.

Figure 5

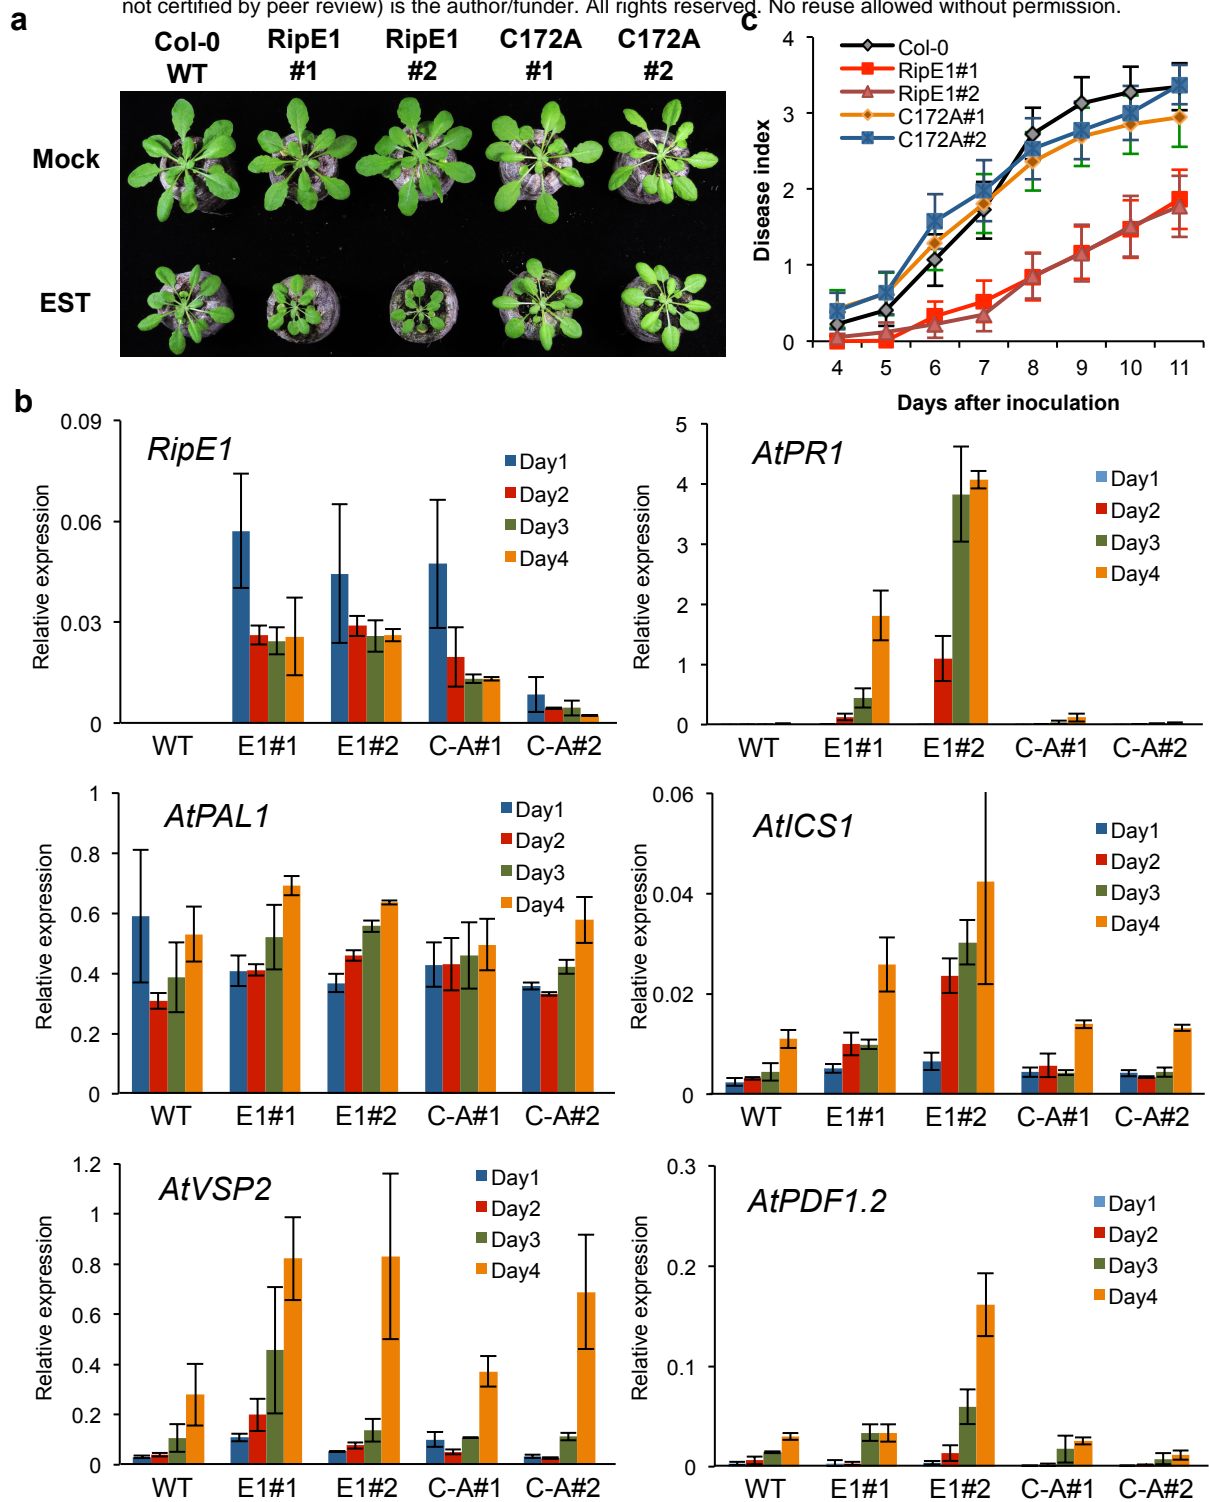

**Figure 5. RipE1 triggers immunity in Arabidopsis.**

(a) Arabidopsis Col-0 wild type or independent stable transgenic lines expressing RipE1 or RipE1 C172A from an estradiol (EST)-inducible promoter were grown for 3 weeks and then treated sprayed with 100  $\mu$ M EST daily. Photographs were taken 2 weeks after beginning the EST treatment. (b) Arabidopsis 4 day-old seedlings were treated with 25  $\mu$ M EST and samples were taken 1, 2, 3, or 4 days after EST treatment. Quantitative RT-PCR to determine the expression of *RipE1*, *AtPR1*, *AtPAL1*, *AtICS1*, *AtVSP2*, and *AtPDF1.2*. Expression values are relative to the expression of the housekeeping gene *AtACT2*. Values indicate mean  $\pm$  SE (n=3). (c) Plants in (a) were inoculated with *R. solanacearum* GMI1000 by soil-drenching. The results are represented as disease progression, showing the average wilting symptoms in a scale from 0 to 4 (mean  $\pm$  SEM). n=20 plants per genotype. Each experiment was repeated at least 3 times with similar results.

Figure 6

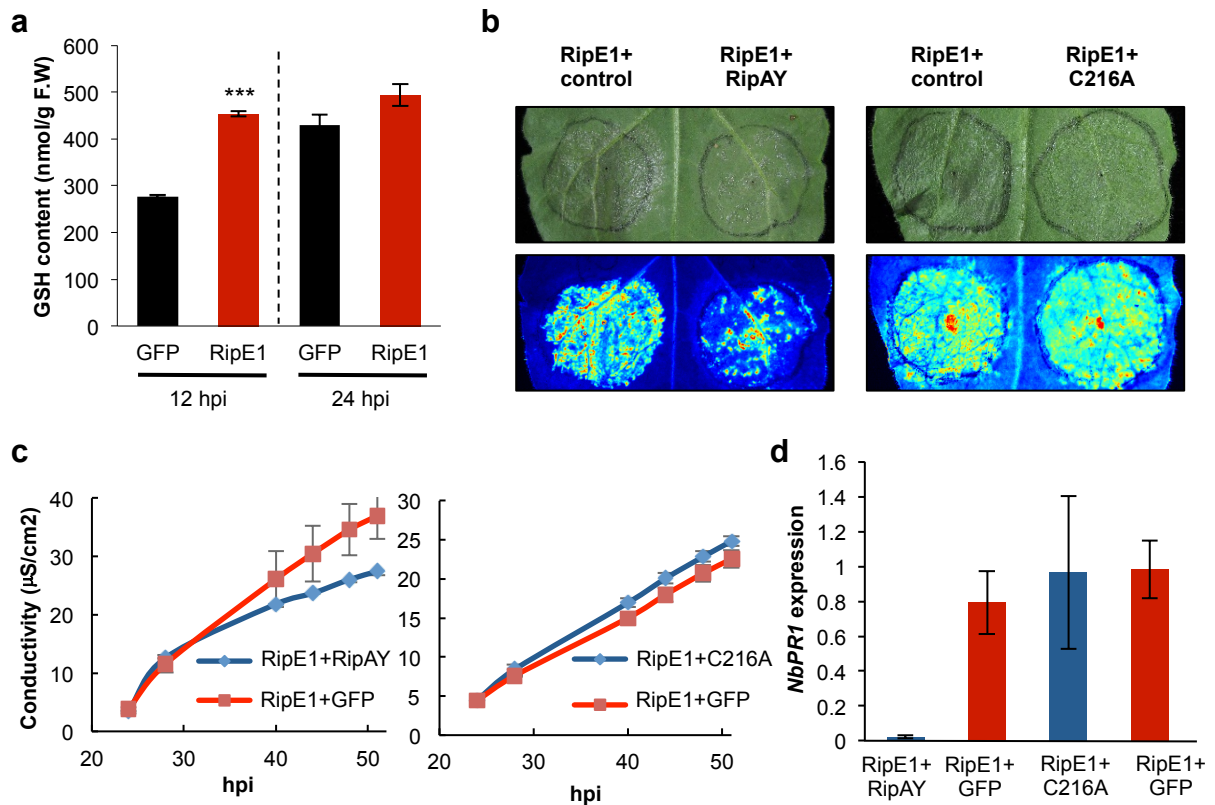

**Figure 6. RipE1-triggered immune responses are suppressed by RipAY.**

(a) RipE1-GFP or GFP (as control) were expressed in the same leaf of *N. benthamiana* using *Agrobacterium* with an  $\text{OD}_{600}$  of 0.5, and samples were taken at the indicated time points to measure the accumulation of glutathione (GSH). (b-d) RipE1-Nluc was co-expressed with GFP (as control), with RipAY-GFP, or with RipAY-C216A-GFP, respectively, in the same leaf. Protein accumulation is shown in the figure S6. (b) Photos were taken 2.5 days post-inoculation with a CCD camera (upper panel) or an UV camera (lower panel). UV signal corresponds to the development of cell death (not GFP fluorescence). UV images were taken from the abaxial side and flipped horizontally for representation. (c) Ion leakage measured in leaf discs taken from *N. benthamiana* tissues expressing RipE1 together with GFP or NahG-GFP, representative of cell death, at the indicated timepoints. Values indicate mean  $\pm$  SE (n=3). (d) Quantitative RT-PCR to determine the expression of *NbPR1* in *N. benthamiana* tissues 48 hours after *Agrobacterium* infiltration. Expression values are relative to the expression of the housekeeping gene *NbEF1a*. Values indicate mean  $\pm$  SE (n=3). Each experiment was repeated at least 3 times with similar results.

Figure S1

```

Xs_XopE1 1 MRRSEAEERSPPNLLQSLQEIKMGLCSSKPSVAGSPVAGSPEHYLTHTEQTTPSTP-SS
Rs_RipE1 1 -----MPPVLPSTILRCF-----RPAVSR-PEAETAAPS--SSQEEINRPGSPERS
Ps_HopX1 1 MRIHSAGHSLPAPGPSVETTE-----K-AVQS-SSAQNPAACS-SQTERPEAGSTQVR

Xs_XopE1 60 PEAPMSPSLHGLVALGSSGTRRDRFR----OPTLQPHEVQQAAYQLGMRLSGRPIEDAS
Rs_RipE1 42 PRRRA-PAALQGLTPRAGSSRRQAAPEAPAGPARFLIDGERQFGGYLMARDVDQRPVHGEP
Ps_HopX1 51 ENYPE-YSS-----VKTRLEFP--VSSTGQAISDTPSSLPFGYLLLRRLDRRPLDEDS

Xs_XopE1 115 DRQRLADATETVHETRLALHRGRGNVSDLRLSNGRSATYSSLSYCLGE-----
Rs_RipE1 101 -IDTLRSANETLLQTRRILTHGRGNVEDDIDATHGLSTHIAQGGRSIQESMWRHAH----
Ps_HopX1 98 -TKALVPADEAVREARRALPFRGNIDVDAQRTHLQSCARAVAAKRLRKDABRAGHEPMP

Xs_XopE1 164 -N---DENLLAGSALAAGAGNCDHNAAINARRHAVRMEGGQ----MMNVRDYEQTHL
Rs_RipE1 155 -PKPVVWA---AIAMVAGAGNCGEHADLAIFLHAAKKEGEA---VDNVHIDDFDHF
Ps_HopX1 157 GNDEMNVHVLVAMSEQVFGAGNCGEHARIASFAYGALAQESGRSPREKIHLAEQPGKDHV

Xs_XopE1 214 YALYQPPSSAAEAESPVVLDSWGDPAVLLRDSHWAETYGTSTNVIERFDKRDATDALAR
Rs_RipE1 205 WAIIVHR--AEPDLERDVYIDAWGKGPATFAVDGMPTYREGERRTKI--GYDKASGEFAHA-
Ps_HopX1 217 WAETDN--SSA-GSSPVMDFWNSGAAILAE DSREFAKDRSAVERTY-SFTLAMAAEAGKV

Xs_XopE1 274 TNAFRAEIEDPQTDLHANARDLETAFLANPAPGDI FSAMEVIAP-----
Rs_RipE1 261 -----DMEML-----ATVLAIRVGGISNTMRRLGPD--YRYPPEERVWAVTP
Ps_HopX1 273 T---RETAEVV-----LTHTTSRLQKRLADQLPNVSPLEGGRYQQE-----KS

Xs_XopE1 318 ---ELAQSTRQRIQEYS-----PRTRQALAA--DAAR--QA
Rs_RipE1 301 IVAQRFTDRVKAEMSKPADLGKLMVPPDCATPSSVEPPVTNERLMQFLRHEIHATRIART
Ps_HopX1 313 VLDEAFARVSDK-----INSDDPRRALQMEIEAVGVAMS

Xs_XopE1 347 YGLDNAQPTSPRTTAATIQDAERLD-----ALGR
Rs_RipE1 361 LGAHSVDTMAH-AARRIVAVASDLQGYPIEAHPLQAKKDAEDIAAAERRRRARRAALGKGE
Ps_HopX1 348 LGAEGVKTVAR-QAPKVVQRARS-----VASSKGM

Xs_XopE1 376 PPLSW-
Rs_RipE1 420 PPATES
Ps_HopX1 377 PPRR--

```

**Figure S1. Phylogenetic analysis of RipE1**

Alignment of the amino acid sequence of RipE1 from *R. solanacearum* GM11000 (Rs\_RipE1), XopE1 from *Xanthomonas campestris* pv. *vesicatoria* (Xs\_XopE1), and HopX1 from *Pseudomonas syringae* pv. *tabaci* 11528 (Ps\_HopX1). Residues forming the predicted catalytic triad are indicated in red, and the conserved domain A is indicated in blue. The black shaded amino acids are identical among the three effectors.

Figure S2

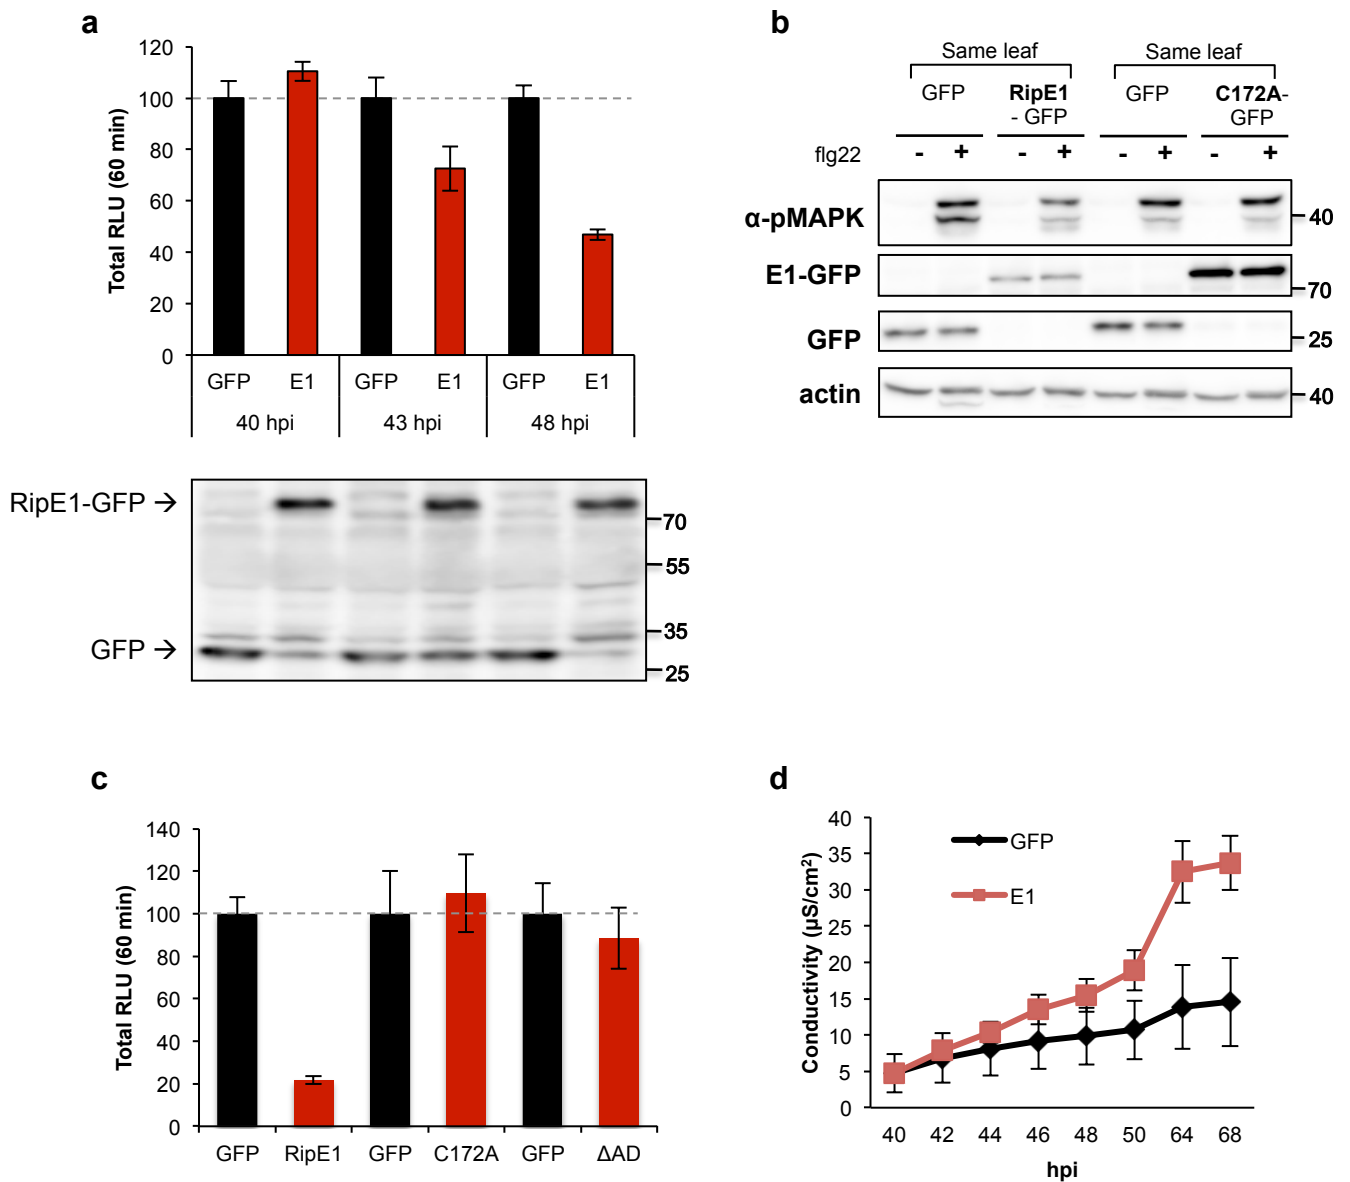

**Figure S2. RipE1 expression inhibits PTI responses in *N. benthamiana*, which correlates with the induction of cell death.**

Agrobacterium was used to induce the transient expression of RipE1-GFP in half of the leaf and GFP in the other half. (a) Oxidative burst triggered by 50 nM flg22 in *N. benthamiana* tissues at the indicated time points, measured in a luminol-based assay as relative luminescence units (RLU). Values are average  $\pm$  SE (n=24), and are represented as % of the GFP control in each time point. Western blot with anti-GFP is shown for reference of protein accumulation at each time point. (b) MAPK activation was induced 40 hours after Agrobacterium infiltration with 100 nM flg22 and analysed 15 minutes after flg22 treatment using anti-phosphorylated MAPK antibody (anti-pMAPK). Immunoblots were also analysed using anti-GFP antibody to verify protein accumulation. Anti-actin was used to verify equal loading. Molecular weight (kDa) marker bands are indicated for reference. (c) Oxidative burst was induced as in (a) and measured 2 days post-Agrobacterium infiltration. Mutant variants are described in the Figure 1. (d) Ion leakage was measured as in the Figure 1. Measurement over time after RipE1 expression reflects that the induction of cell death correlates in time with the suppression of PTI responses. The experiments were repeated three times with similar results.



Figure S3

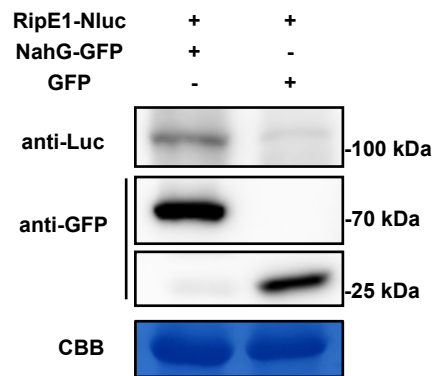

**Figure S3. Protein accumulation upon co-expression of RipE1 and NahG.**

Western blot showing protein accumulation in the experiments shown in the figure 2. Molecular weight (kDa) marker bands are indicated for reference.

Figure S4

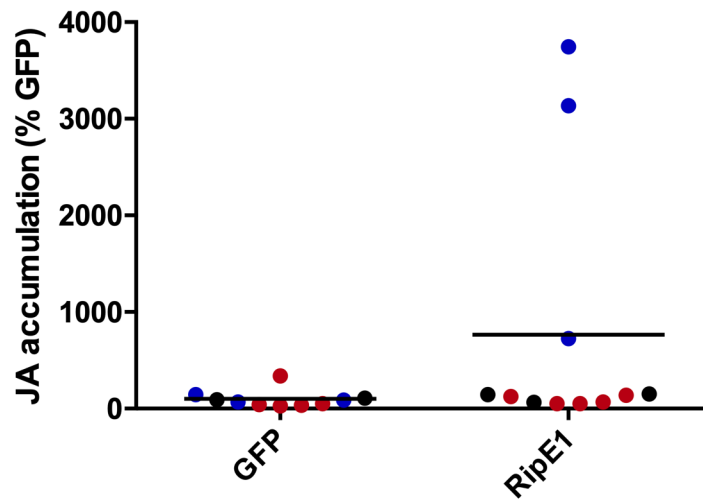

**Figure S4. RipE1 expression leads to an increase in JA contents.**

Measurement of JA accumulation in *N. benthamiana* tissues expressing GFP or RipE1, using *Agrobacterium* with an  $OD_{600}$  of 0.5. Samples were taken 42 hours after *Agrobacterium* infiltration. Three independent biological repeats were performed, and the different colors indicate values from different replicates. Values are represented as % of the GFP control in each replicate.

Figure S5

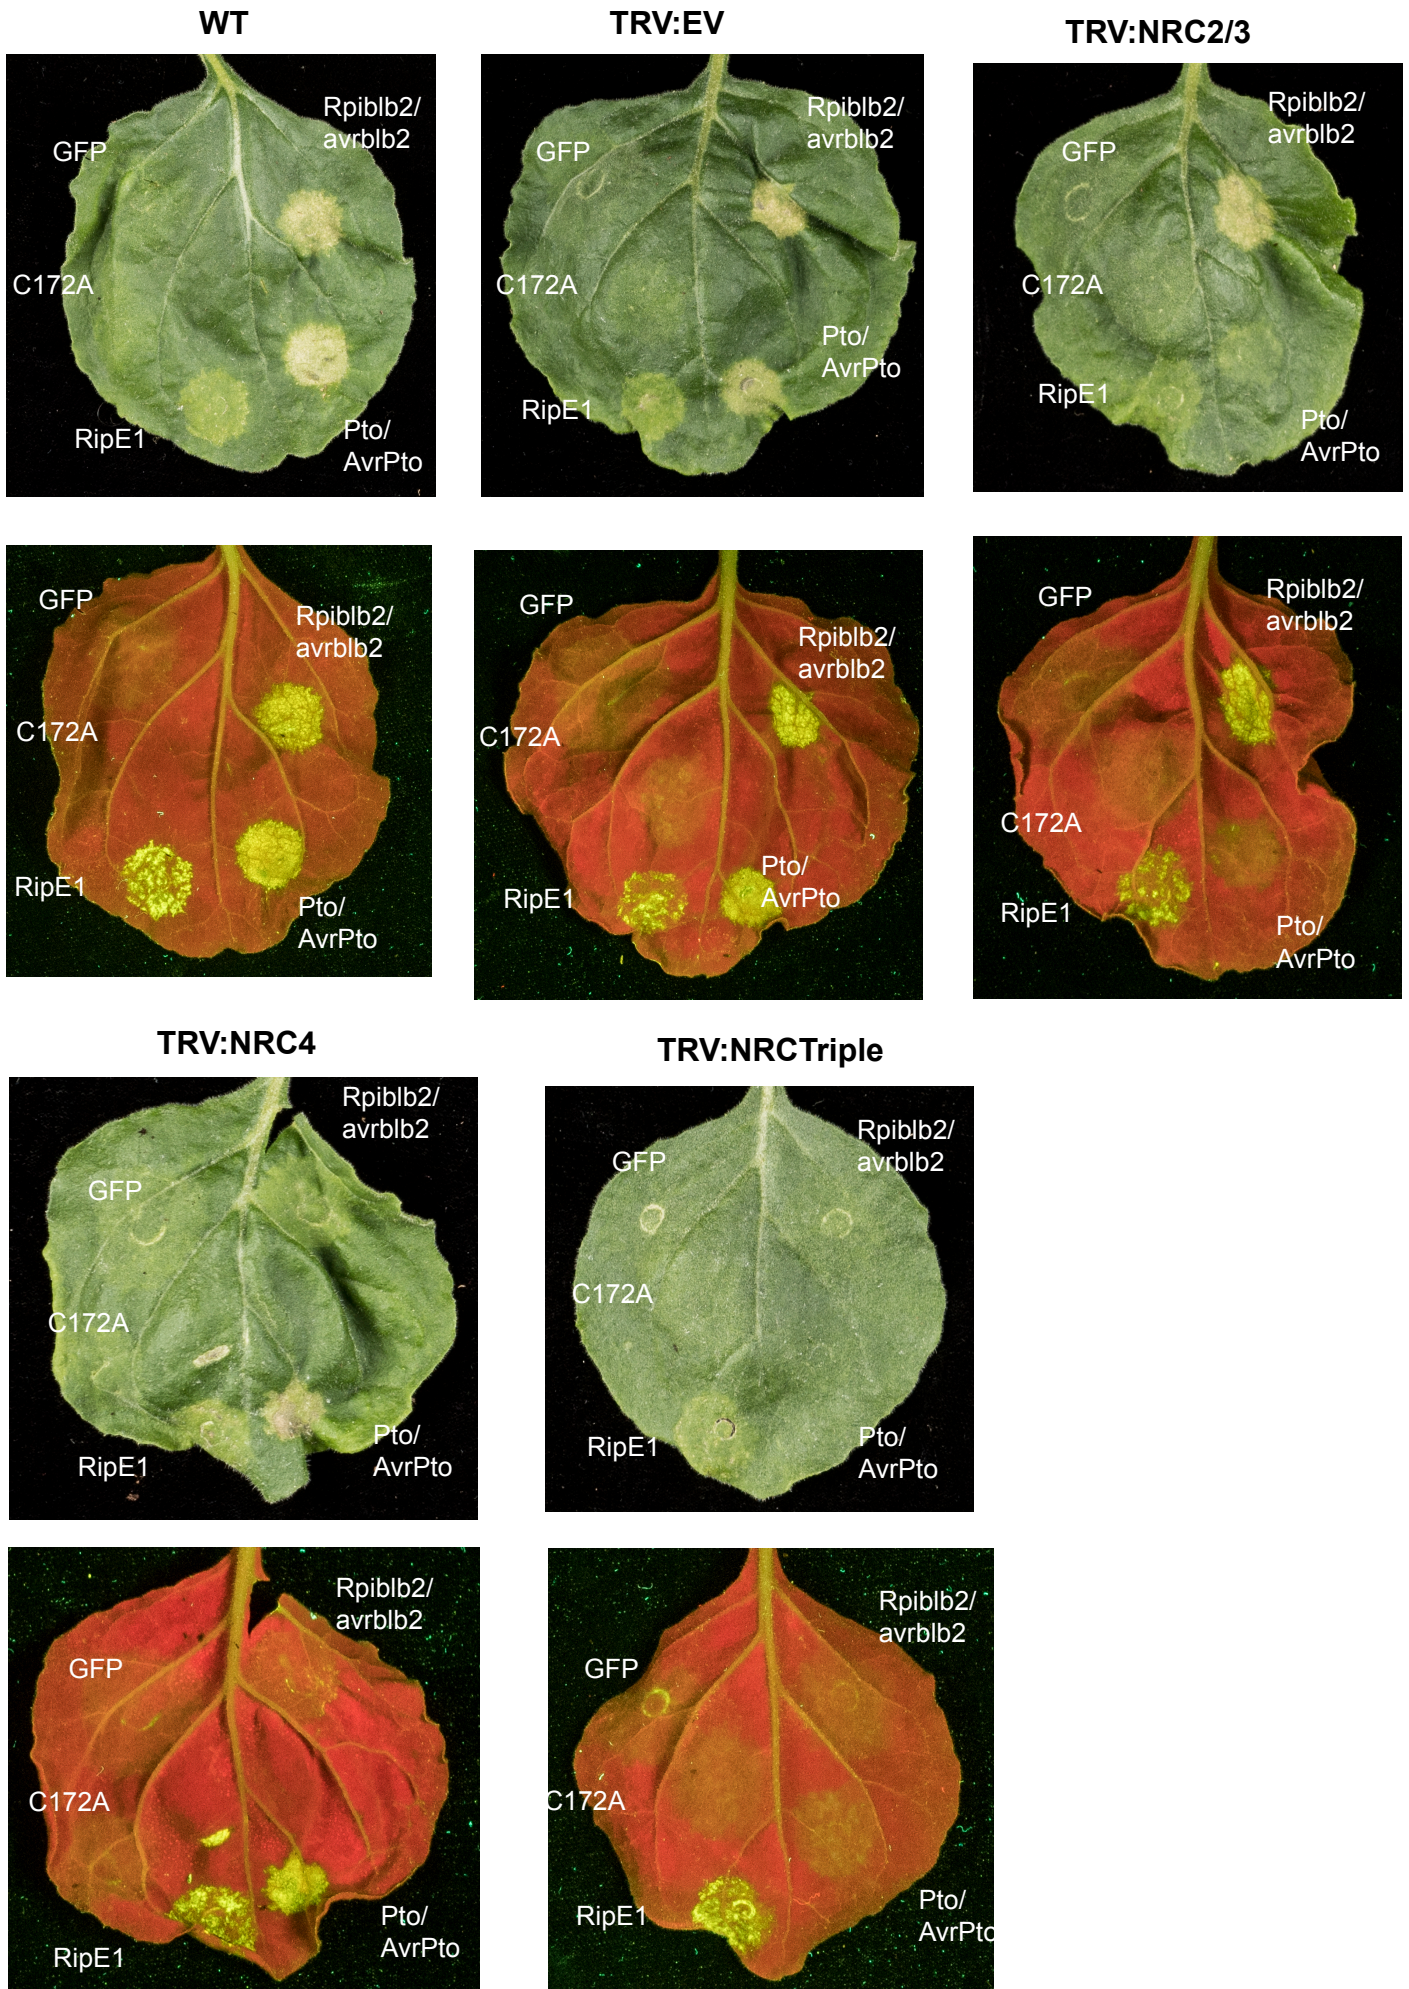

**Figure S5. RipE1-triggered cell death does not require NRC proteins.**

RipE1-GFP, C172A or GFP (as control) were transiently expressed using agrobacterium into wild type (WT) *N. benthamiana*, leaves silenced with EV (as control) and those silenced with different NRC homologs (NRC2/3, NRC4 and NRC2/3/4-Triple), using VIGS. For RipE1-GFP, C172A and GFP an OD<sub>600</sub> of 0.5 was used. Rpiblb2 (OD<sub>600</sub> 0.2)/AVRblb2 (OD<sub>600</sub> 0.1) and Pto (OD<sub>600</sub> 0.6)/AVRPto (OD<sub>600</sub> 0.1), which are NRC4 and NRC2/3 dependent, respectively, were included as controls. Photos were taken 5 days post inoculation under natural or UV light. UV images were taken from the abaxial side and flipped horizontally for representation.

Figure S6

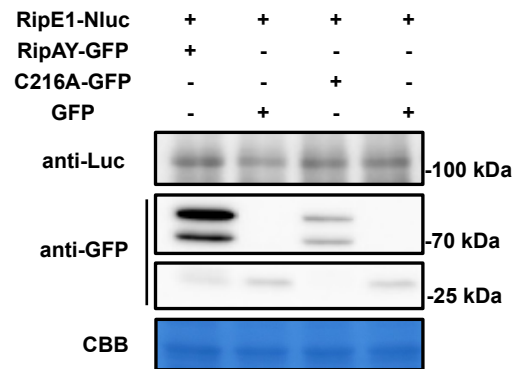

**Figure S6. Protein accumulation upon co-expression of RipE1 and RipAY.**

Western blot showing protein accumulation in the experiments shown in the figure 6. Molecular weight (kDa) marker bands are indicated for reference.
